# Supplementary material
Source: HighWire-hosted journal article supplement (https://bmjopen.bmj.com/content/7/11/e017184)
Supplement: inline-supplementary-material-1 [file inline-supplementary-material-1.pdf]

## APPENDIX 1: SEARCH STRATEGY

- 1 Prediabetic State/ (23277)
- 2 impaired glucose tolerance/ (19287)
- 3 pre-diabetes.mp. (2246)
- 4 prediabetes.mp. (4958)
- 5 prediabetic state.mp. (4559)
- 6 pre-diabetic state.mp. (240)
- 7 impaired glucose tolerance.mp. (32249)
- 8 impaired fasting glucose.mp. (6549)
- 9 potential diabetes.mp. (198)
- 10 pre-diabetic stage.mp. (68)
- 11 latent diabetes.mp. (652)
- 12 prediabetic stage.mp. (202)
- 13 Diabetes, Gestational/ (24323)
- 14 pregnancy diabetes mellitus/ or maternal diabetes mellitus/ (20845)
- 15 gestational diabetes.mp. (18831)
- 16 or/1-15 (69857)
- 17 (child\$ or infant\$ or infancy or adolescen\$ or teenage\$).ti. (1750186)
- 18 16 not 17 (65891)
- 19 \*Diabetes, Gestational/ge (191)
- 20 (genetic\$ or gene\$).ti. (1830637)
- 21 \*Prediabetic State/ge (76)
- 22 or/19-21 (1830786)
- 23 18 not 22 (63522)
- 24 Metformin/ (43628)
- 25 Metformin.mp. (47524)
- 26 Life Style/ (120180)
- 27 "lifestyle and related phenomena"/ or lifestyle/ or lifestyle modification/ (139345)
- 28 (lifestyle or life style).mp. (208535)
- 29 exp Exercise/ (346028)
- 30 (exercise\$ or physical fitness).mp. (623155)

31 exp Sports/ (239490)  
 32 sport\$1.mp. (157693)  
 33 exp Diet/ (421786)  
 34 (diet or eating habit\$).mp. (816776)  
 35 dh.fs. (40922)  
 36 or/24-35 (1821241)  
 37 23 and 36 (19188)  
 38 \*Metformin/ or \*Life Style/ or (\*"lifestyle and related phenomena"/ or \*lifestyle/ or \*lifestyle modification/) or exp \*Exercise/ or exp \*Sports/ or exp  
 \*Diet/ (495981)  
 39 (Metformin or (lifestyle or life style) or (exercise\$ or physical fitness) or sport\$1 or (diet or eating habit\$)).ti. (349954)  
 40 38 or 39 (653819)  
 41 37 and 40 (4154)  
 42 exp treatment outcome/ (1701813)  
 43 (effective\$ or reduce\$ or delay\$).mp. (6425993)  
 44 (reduction or outcome\$).mp. (5062163)  
 45 (success\$ or fail\$ or prevent\$).mp. (5784522)  
 46 or/42-45 (13445211)  
 47 41 and 46 (2863)  
 48 \*Prediabetic State/ or \*impaired glucose tolerance/ or \*Diabetes, Gestational/ or (\*pregnancy diabetes mellitus/ or \*maternal diabetes mellitus/)  
 (27672)  
 49 (pre-diabetes or prediabetes or prediabetic state or pre-diabetic state or impaired glucose tolerance or impaired fasting glucose or potential diabetes  
 or pre-diabetic stage or latent diabetes or prediabetic stage or gestational diabetes).ti. (18273)  
 50 48 or 49 (32306)  
 51 47 and 50 (1308)  
 52 remove duplicates from 51 (1008)  
 53 from 52 keep 1-2 (2)  
 54 52 not 53 (1006)

## APPENDIX 2: SUMMARY OF INCLUDED STUDIES

| OGTT = oral glucose tolerance test, FPG= fasting plasma glucose, DPP = diabetes prevention programme, DPS=diabetes prevention study, IFG=impaired fasting glucose, IGT=impaired glucose tolerance |                     |         |                                                                                   |                                    |                                            |                          |                          |                                               |                      |                |                                         |
|---------------------------------------------------------------------------------------------------------------------------------------------------------------------------------------------------|---------------------|---------|-----------------------------------------------------------------------------------|------------------------------------|--------------------------------------------|--------------------------|--------------------------|-----------------------------------------------|----------------------|----------------|-----------------------------------------|
| First author                                                                                                                                                                                      | Year of publication | Country | Type of study                                                                     | Population size                    | Target Group                               | Lifestyle/ Metformin     | Duration of intervention | Duration of intervention + follow up analysis | ICER (health system) | ICER (society) | Measure of effectiveness: QALY/DALY/LYG |
| STUDIES BASED ON US DPP, DPPOS OR MODIFIED DPP                                                                                                                                                    |                     |         |                                                                                   |                                    |                                            |                          |                          |                                               |                      |                |                                         |
| Herman                                                                                                                                                                                            | 2005                | US      | Clinical trial (Diabetes Prevention Program) + Lifetime simulation (Markov model) | 3234 in clinical trial             | IGT +IFG >25 years BMI>24kg/m <sup>2</sup> | a. Lifestyle             | 2.8 years                | Lifetime simulation                           | \$1,124 per QALY     | NA             | QALY                                    |
|                                                                                                                                                                                                   |                     |         |                                                                                   |                                    |                                            | b. Metformin             | 2.8 years                | Lifetime simulation                           | \$31,286 per QALY    | NA             | QALY                                    |
| Eddy                                                                                                                                                                                              | 2005                | US      | Simulation model (Archimedes)                                                     | 10,000 people in Kaiser Permanente | IGT + IFG BMI>24kg/m <sup>2</sup>          | a. DPP lifestyle program | 2.8 years                | 30 years                                      | \$143,000/QALY       | \$62,600       | QALY                                    |
|                                                                                                                                                                                                   |                     |         |                                                                                   |                                    |                                            | b. DPP metformin         | 2.8 years                | 30 years                                      | \$35,400/QALY        | \$35,523       | QALY                                    |

|           |      |                                                                |                                                    |                                                                               |                                                                   |                                                           |                                                                           |                     |                                                                                      |                                       |      |
|-----------|------|----------------------------------------------------------------|----------------------------------------------------|-------------------------------------------------------------------------------|-------------------------------------------------------------------|-----------------------------------------------------------|---------------------------------------------------------------------------|---------------------|--------------------------------------------------------------------------------------|---------------------------------------|------|
| DPPRG     | 2012 | US                                                             | 10-year, within-trial, intention-to-treat analysis | DPP: 3,234<br>DPPOS: 2,766                                                    | IGT + IFG >25 years<br>BMI>24kg/m2                                | a. Lifestyle                                              | DPP: 3.2 years<br>DPP/DPP OS bridge: 1 year<br>DPPOS maintenance: 6 years | 10 years            | \$10,037/QALY (\$6,651 undiscounted)                                                 | \$14,365/QALY (£11,274 undiscounted ) | QALY |
|           |      |                                                                |                                                    |                                                                               |                                                                   | b. Metformin                                              |                                                                           |                     | Cost saving                                                                          | Cost saving                           | QALY |
| Ackermann | 2006 | US                                                             | Markov model                                       | 3,234                                                                         | IGT, 50 years old                                                 | a. DPP lifestyle intervention: participants aged 50 years | Until participant gets DM or dies                                         | Lifetime simulation | \$1288/QALY                                                                          |                                       | QALY |
|           |      |                                                                |                                                    |                                                                               |                                                                   | b. DPP lifestyle intervention: participants aged 65 years |                                                                           | Lifetime simulation | \$1575/QALY                                                                          |                                       | QALY |
| Palmer    | 2004 | Australia, France, Germany, Switzerland and the United Kingdon | Markov model simulation                            | Cohort based on US DPP (average age 50.6 yrs, mean BMI 34.0 kg/m2, 32.2% men) | IGT<br><br>Mean age: 50.6 years<br>32.2% men<br>Mean BMI: 34kg/m2 | a. DPP lifestyle intervention                             | 3 years                                                                   | Lifetime simulation | Euro 6381/LYG in the UK<br>Cost saving in Australia, Switzerland, France and Germany |                                       | LYG  |
|           |      |                                                                |                                                    |                                                                               |                                                                   | b. Metformin                                              | 3 years                                                                   | Lifetime simulation | Euro 5400/LYG in the UK<br>Cost saving in Australia, Switzerland, France and Germany |                                       | LYG  |

|                                              |      |           |                                                                                                  |                                                                               |                                                                  |                                                                   |                                                                           |                     |               |                                                                          |      |
|----------------------------------------------|------|-----------|--------------------------------------------------------------------------------------------------|-------------------------------------------------------------------------------|------------------------------------------------------------------|-------------------------------------------------------------------|---------------------------------------------------------------------------|---------------------|---------------|--------------------------------------------------------------------------|------|
| Palmer                                       | 2012 | Australia | Markov model (TreeAge Pro)                                                                       | Cohort based on US DPP (average age 50.6 yrs, mean BMI 34.0 kg/m2, 32.2% men) | IGT +/- IFG                                                      | a. US DPP lifestyle intervention, then DPP/DPPOS bridge and DPPOS | DPP: 3.2 years<br>DPP/DPP OS bridge: 1 year<br>DPPOS maintenance: 6 years | Lifetime simulation | Cost saving   |                                                                          | QALY |
|                                              |      |           |                                                                                                  |                                                                               |                                                                  | b. Metformin, then DPP/DPPOS bridge and DPPOS                     |                                                                           | Lifetime simulation |               |                                                                          |      |
| Png                                          | 2014 | Singapore | Decision tree in Excel                                                                           | Cohort based on US DPP                                                        | IGT +/- IFG                                                      | a. US DPP lifestyle intervention                                  | 3 years                                                                   | 3 years             | \$17,184/QALY | \$36,663/QALY                                                            | QALY |
|                                              |      |           |                                                                                                  |                                                                               |                                                                  | b. Metformin                                                      | 3 years                                                                   | 3 years             | \$21,065/QALY | \$6,367/QALY                                                             | QALY |
| STUDIES BASED ON FINNISH DPS OR MODIFIED DPS |      |           |                                                                                                  |                                                                               |                                                                  |                                                                   |                                                                           |                     |               |                                                                          |      |
| Lindgren                                     | 2007 | Sweden    | Markov model (evaluated using Monte Carlo simulation) based on Finnish Diabetes Prevention Study | 397                                                                           | 60-year olds in the County of Stockholm with BMI>26mg/m2 and IFG | Lifestyle Program used in the Finnish Diabetes Prevention Study   | 6 years                                                                   | Lifetime simulation |               | Cost saving (Euro -9265 per QALY<br>Euro -14,692 per QALY undiscounted ) | QALY |

|                                                                     |      |         |                         |                                             |                                                        |                                                            |                                  |                     |                             |                              |                                                  |
|---------------------------------------------------------------------|------|---------|-------------------------|---------------------------------------------|--------------------------------------------------------|------------------------------------------------------------|----------------------------------|---------------------|-----------------------------|------------------------------|--------------------------------------------------|
| Caro                                                                | 2004 | Canada  | Markov model            | NA                                          | IGT                                                    | a. Intensive lifestyle intervention (based on Finnish DPS) | 5 years                          | 10 years            | \$749/LYG                   |                              | QALY                                             |
|                                                                     |      |         |                         |                                             |                                                        | b. Metformin                                               | 5 years                          | 10 years            | Cost saving (- \$7136/LYG)  |                              | QALY                                             |
|                                                                     |      |         |                         |                                             |                                                        | c. Acarbose                                                | 5 years                          | 10 years            | Cost saving (- \$4485/LYG)  |                              | QALY                                             |
| STUDIES BASED ON INDIAN DPP                                         |      |         |                         |                                             |                                                        |                                                            |                                  |                     |                             |                              |                                                  |
| Ramachandran                                                        | 2007 | India   | Within-trial analysis   | 531                                         | IGT (2 positive OGTTs in 35-55 year olds)              | a. Lifestyle modification                                  | 3 years                          | 3 years             |                             |                              | Number needed to treat to prevent 1 case of T2DM |
|                                                                     |      |         |                         |                                             |                                                        | b. Metformin                                               | 3 years                          | 3 years             |                             |                              |                                                  |
|                                                                     |      |         |                         |                                             |                                                        | c. Lifestyle modification and metformin                    | 3 years                          | 3 years             |                             |                              |                                                  |
| STUDIES INCLUDING SCREENING + INTERVENTION BASED ON US DPP OR DPPOS |      |         |                         |                                             |                                                        |                                                            |                                  |                     |                             |                              |                                                  |
| Hoegler                                                             | 2007 | US      | Markov simulation model | Population cohort based on 1999-2000 NHANES | IFG and/or IGT US adults aged 45-74 with BMI>=25kg/m2. | 1. Screening and DPP lifestyle for IFG and FPG             | Intervention until T2DM develops | Lifetime simulation | \$8,181/QALY                | \$16,345/QALY                | QALY                                             |
|                                                                     |      |         |                         |                                             |                                                        | 2. Screening and DPP for IFG or IGT or IFG and IGT         | Intervention until T2DM develops | Lifetime simulation | \$9,511/QALY                | \$18,777/QALY                | QALY                                             |
| Icks                                                                | 2007 | Germany | Decision analytic model | 72,435                                      | IGT +/- IFG Aged 60-74 years                           | 1. Lifestyle program as in USDPP                           | 3 years                          | 3 years             | £3,127/case of T2DM avoided | £18,112/case of T2DM avoided | Number of cases of                               |

|                        |             |         |                                                                                   |                                         |                                                                                                               |                                                                                                                 |                                                               |                            |                                                   |                                    |                     |
|------------------------|-------------|---------|-----------------------------------------------------------------------------------|-----------------------------------------|---------------------------------------------------------------------------------------------------------------|-----------------------------------------------------------------------------------------------------------------|---------------------------------------------------------------|----------------------------|---------------------------------------------------|------------------------------------|---------------------|
|                        |             |         |                                                                                   |                                         | BMI<br>≥24kg/m <sup>2</sup>                                                                                   | 2. Metformin                                                                                                    | 3 years                                                       | 3 years                    | £12,731/case<br>of T2DM<br>avoided                | £21,313/case<br>of T2DM<br>avoided | diabetes<br>avoided |
| <b>Schaufli<br/>er</b> | <b>2010</b> | Germany | Markov model<br>(TreeAge Pro)                                                     | 1 million individua<br>ls<br>modelled   | IGT                                                                                                           | 1. Lifestyle<br>program as in<br>USDPP                                                                          | Not<br>specified                                              | Lifetime<br>simulatio<br>n | Euro 562/QALY                                     |                                    | QALY                |
|                        |             |         |                                                                                   |                                         |                                                                                                               | 2. Metformin                                                                                                    | Not<br>specified                                              | Lifetime<br>simulatio<br>n | Euro 325/QALY                                     |                                    | QALY                |
| <b>Zhou</b>            | <b>2012</b> | US      | Markov model                                                                      | Eligible<br>populatio<br>n in the<br>US | 18-64 yrs,<br>CDC<br>diabetes<br>risk test if<br>BMI≥25kg/<br>m <sup>2</sup> , if<br>positive FPG<br>or HbA1c | Community<br>based lifestyle<br>intervention<br>(PLAN4WARD)                                                     | 3 years                                                       | 25 years                   | Cost saving                                       |                                    | QALY                |
| <b>Mortaz</b>          | <b>2012</b> | Canada  | Markov model<br>(in TreeAge)                                                      | NA                                      | IFG                                                                                                           | Screening with<br>FPG every 3<br>years followed<br>by US DPP<br>based lifestyle<br>intervention or<br>metformin | Not<br>specified                                              | 10 year<br>analysis        | CA\$16,800/QA<br>LY                               |                                    | QALY                |
| <b>Herman</b>          | <b>2013</b> | US      | 10-year,<br>within-trial,<br>intention-to-<br>treat analysis:<br>DPP and<br>DPPOS | 3,234<br>participa<br>nts in<br>DPP     | IGT +/- IFG<br>BMI>24mg/<br>kg<br>Screen 45-<br>74 year olds<br>RCBG,                                         | a. USDPP<br>lifestyle<br>intervention<br>(individual<br>sessions) and<br>USDPPPOS                               | DPP: 3.2<br>years<br>DPP/DPP<br>OS bridge:<br>1 year<br>DPPOS | 10 years                   | \$19,988/QALY<br>(cost-saving if<br>undiscounted) | \$3,235/QALY<br>(undiscounted)     | QALY                |

|                                                           |      |       |                              |                  |                           |                                                          |                      |          |                                            |                                                                                          |      |
|-----------------------------------------------------------|------|-------|------------------------------|------------------|---------------------------|----------------------------------------------------------|----------------------|----------|--------------------------------------------|------------------------------------------------------------------------------------------|------|
|                                                           |      |       |                              |                  | follow up OGTT            | b. USDPP lifestyle intervention (in groups) and USDPPPOS | maintenance: 6 years |          | \$9,688/QALY (cost saving if undiscounted) | Cost saving (undiscounted)                                                               | QALY |
|                                                           |      |       |                              |                  |                           | b. USDPPPOS Metformin                                    |                      |          | \$20,183 (cost saving if undiscounted)     | Cost saving (undiscounted)                                                               | QALY |
| Dall                                                      | 2015 | US    | Markov microsimulation model | Adults in the US | Elevated HbA1c (5.7-6.4%) | USDPPPOS                                                 | 10 years             | 10 years |                                            | Cost saving                                                                              | QALY |
| <b>STUDIES INCLUDING SCREENING + DA QING INTERVENTION</b> |      |       |                              |                  |                           |                                                          |                      |          |                                            |                                                                                          |      |
| Liu                                                       | 2013 | China | Markov model                 | NA               | IFG and IGT               | a. Screening with diet intervention                      | 6 years              | 40 years |                                            | Initiation age: 25yrs: -- \$2,044/QALY<br>40 yrs: - \$1,527/QALY<br>60 yrs: - 3,602/QALY | QALY |
|                                                           |      |       |                              |                  |                           | b. Screening with exercise intervention                  | 6 years              | 40 years |                                            | Initiaton age: 25: - \$2,063/QALY<br>40: - \$1,540/QALY<br>60: - \$3,713/QALY            | QALY |



|                                                  |             |           |                                     |                                           |                                                                                                                                                                                     |                                    |                                               |                        |                  |                                                                                              |      |
|--------------------------------------------------|-------------|-----------|-------------------------------------|-------------------------------------------|-------------------------------------------------------------------------------------------------------------------------------------------------------------------------------------|------------------------------------|-----------------------------------------------|------------------------|------------------|----------------------------------------------------------------------------------------------|------|
|                                                  |             |           |                                     |                                           |                                                                                                                                                                                     | c. Screening with duo intervention | 6 years                                       | 40 years               |                  | Initiation age<br>25 yrs: - \$2,061/QALY<br>40 yrs: - \$1,507/QALY<br>60 yrs: - \$3,713/QALY | QALY |
|                                                  |             |           |                                     |                                           |                                                                                                                                                                                     | d. Screening alone                 | 6 years                                       | 40 years               |                  | Initiation age<br>25 yrs: - \$471/QALY<br>40 yrs: - \$331/QALY<br>60yrs: - \$1,195/QALY      | QALY |
| <b>STUDIES INCLUDING SCREENING + FINNISH DPS</b> |             |           |                                     |                                           |                                                                                                                                                                                     |                                    |                                               |                        |                  |                                                                                              |      |
| <b>Bertram</b>                                   | <b>2010</b> | Australia | Discrete-time microsimulation model | 8,000 individual life histories simulated | IGT and IFG (Opportunistic screening of Australians over the age of 45 years with risk factors for T2DM during GP visit for another reason using FPG followed by confirmatory OGTT) | a. Diet plus exercise              | As long as a participant remains pre-diabetic | Until age 100 or death | AU\$23,000/DALY  |                                                                                              | DALY |
|                                                  |             |           |                                     |                                           |                                                                                                                                                                                     | b. Exercise                        |                                               | Until age 100 or death | AU\$30,000/DALY  |                                                                                              | DALY |
|                                                  |             |           |                                     |                                           |                                                                                                                                                                                     | c. Diet                            |                                               | Until age 100 or death | AU\$38,000/DALY  |                                                                                              | DALY |
|                                                  |             |           |                                     |                                           |                                                                                                                                                                                     | d. Acarbose                        |                                               | Until age 100 or death | AU\$37,000/DALY  |                                                                                              | DALY |
|                                                  |             |           |                                     |                                           |                                                                                                                                                                                     | e. Metformin                       |                                               | Until age 100 or death | AU\$22,000/DALY  |                                                                                              | DALY |
|                                                  |             |           |                                     |                                           |                                                                                                                                                                                     | f. Orlistat                        |                                               | Until age 100 or death | AU\$100,000/DALY |                                                                                              | DALY |

|                                                                              |             |         |                                   |                                                                                                |                                                                                                                                                     |                                                                                     |                                                        |                                                    |                 |                                                                                                                                                 |      |
|------------------------------------------------------------------------------|-------------|---------|-----------------------------------|------------------------------------------------------------------------------------------------|-----------------------------------------------------------------------------------------------------------------------------------------------------|-------------------------------------------------------------------------------------|--------------------------------------------------------|----------------------------------------------------|-----------------|-------------------------------------------------------------------------------------------------------------------------------------------------|------|
|                                                                              |             |         |                                   |                                                                                                |                                                                                                                                                     | g. Metformin plus diet and exercise                                                 |                                                        | Until age 100 or death                             | AU\$81,000/DALY |                                                                                                                                                 | DALY |
| <b>STUDIES INCLUDING SCREENING + OTHER INTERVENTION &gt;2 YEARS DURATION</b> |             |         |                                   |                                                                                                |                                                                                                                                                     |                                                                                     |                                                        |                                                    |                 |                                                                                                                                                 |      |
| <b>Neumann</b>                                                               | <b>2011</b> | Germany | Trial based cost utility analysis | NA                                                                                             | IFG and T2DM (FPG screening: 45-70 year-olds with elements of metabolic syndrome or GDM)                                                            | Group lifestyle program                                                             | 5 years                                                | Lifetime simulation                                |                 | Age 30: Men (-Eur25,164), Women (Eur -31,407)<br>Age 50: Men (Eur -15,108), Women (Eur -21,215)<br>Age 70: Men (Eur 27,546), Women (Eur 19,433) | QALY |
| <b>Sagarra</b>                                                               | <b>2013</b> | Spain   | Trial-based cost utility analysis | 552 participants in trial<br>230 in group-based intervention<br>103 in individual intervention | IGT and/or IFG in people aged 45-75 identified with FINDRISC >14 or requesting OGTT regardless of FINDRISC score<br>Av age: 62 yrs, Av BMI: 31kg/m2 | 1. Group intensive lifestyle program<br>2. Individual intensive lifestyle programme | 5 years:<br>1 year: Screening<br>4 years: Intervention | Median: 4.2 years<br>No analysis post-intervention | Euro 3243/QALY  |                                                                                                                                                 | QALY |
| <b>STUDIES INCLUDING SCREENING + INTERVENTION OF UNSPECIFIED DURATION</b>    |             |         |                                   |                                                                                                |                                                                                                                                                     |                                                                                     |                                                        |                                                    |                 |                                                                                                                                                 |      |

|           |      |           |                                                                                                                       |                             |                                                                                                                                    |                                                                                                        |            |                    |                                                                                                   |                                                                                                       |              |
|-----------|------|-----------|-----------------------------------------------------------------------------------------------------------------------|-----------------------------|------------------------------------------------------------------------------------------------------------------------------------|--------------------------------------------------------------------------------------------------------|------------|--------------------|---------------------------------------------------------------------------------------------------|-------------------------------------------------------------------------------------------------------|--------------|
| Gilles    | 2008 | UK        | Decision tree and Markov model                                                                                        | NA                          | IGT (One-off screening with FPG and OGTT for population aged 45 yrs with at least 1 risk factor for T2DM)                          | Screening for T2DM only                                                                                | Not stated | 50 year simulation | Cost per QALY: £14150 (£8681/QALY undiscounted)<br>Cost per LYG: £23710 (£11460/LYG undiscounted) |                                                                                                       | QALY and LYG |
|           |      |           |                                                                                                                       |                             |                                                                                                                                    | Screening for T2DM and IGT and treatment with lifestyle program                                        | Not stated | 50 year simulation | Cost per QALY: £6242 (£2863/QALY undiscounted)<br>Cost per LYG: £10900 (£4179 undiscounted)       |                                                                                                       | QALY and LYG |
|           |      |           |                                                                                                                       |                             |                                                                                                                                    | Screening for T2DM and IGT and treatment with metformin                                                | Not stated | 50 year simulation | Cost per QALY: £7023 (£3429/QALY undiscounted)<br>Cost per LYG: £11690 (£4786/LYG undiscounted)   |                                                                                                       | QALY and LYG |
| Colagiuri | 2008 | Australia | Simulation using the Diabetes Cost Benefit model, including cost benefit analysis and cost utility analysis (\$/DALY) | Whole Australian population | Screening for undiagnosed T2DM and prediabetes (IGT and IFG) in Australians aged 55-74 years and those who were 45-54 years with a | Screening (risk factor assessment), FPG for those at high risk, OGTT for those with FPG 5.9-6.6 mmol/l | 10 years   | 10 year simulation |                                                                                                   | \$53,955/DALY in 45-54 year olds<br>\$48,386/DALY in 55-74 year olds<br>\$49,713/DALY 45-74 year olds | DALY         |

|                                                                       |             |    |                                                                                                       |                                                                              |                                                                                                              |                                                         |                                                                |         |              |              |      |
|-----------------------------------------------------------------------|-------------|----|-------------------------------------------------------------------------------------------------------|------------------------------------------------------------------------------|--------------------------------------------------------------------------------------------------------------|---------------------------------------------------------|----------------------------------------------------------------|---------|--------------|--------------|------|
|                                                                       |             |    |                                                                                                       |                                                                              | BMI $\geq$ 30,<br>family<br>history of<br>T2DM<br>and/or<br>hypertensio<br>n                                 |                                                         |                                                                |         |              |              |      |
| <b>STUDIES INCLUDING SCREENING +INTERVENTION &lt;2 YEARS DURATION</b> |             |    |                                                                                                       |                                                                              |                                                                                                              |                                                         |                                                                |         |              |              |      |
| <b>Irvine</b>                                                         | <b>2011</b> | UK | Trial-based<br>cost-utility<br>analysis                                                               | 177 partici<br>pants in<br>trial, 118<br>allocated<br>to<br>intervent<br>ion | IFG and<br>T2DM<br>(FPG<br>screening of<br>45-70 years<br>olds with<br>elements of<br>metabolic<br>syndrome) | UEA-IFG<br>lifestyle<br>program                         | Control:<br>6.69<br>months<br>Interventi<br>on: 7.28<br>months | 1 year  | £67,163/QALY |              | QALY |
| <b>STUDIES INCLUDING NO SCREENING AND OTHER INTERVENTIONS</b>         |             |    |                                                                                                       |                                                                              |                                                                                                              |                                                         |                                                                |         |              |              |      |
| <b>Smith</b>                                                          | <b>2010</b> | US | Markov model<br>(TreeAgePro)<br>based on<br>findings of<br>non-<br>randomised<br>prospective<br>trial | Not<br>stated                                                                | 55 year old<br>men with<br>BMI $\geq$ 25kg/<br>m2 and at<br>least 3 signs<br>of<br>metabolic<br>syndrome     | Modified DPP<br>designed for<br>distinct<br>populations | 12-14<br>weeks                                                 | 3 years |              | \$3,420/QALY | QALY |

|                                                                            |             |             |                              |                                                                 |                                                            |                                                                            |                                 |                                  |                                                                                                                                                                                                         |                                                                                                                                                                                               |      |
|----------------------------------------------------------------------------|-------------|-------------|------------------------------|-----------------------------------------------------------------|------------------------------------------------------------|----------------------------------------------------------------------------|---------------------------------|----------------------------------|---------------------------------------------------------------------------------------------------------------------------------------------------------------------------------------------------------|-----------------------------------------------------------------------------------------------------------------------------------------------------------------------------------------------|------|
| <b>Feldman</b>                                                             | <b>2013</b> | Sweden      | Markov microsimulation model | 142                                                             | People in primary care with evidence of metabolic syndrome | Primary care - based lifestyle program (Kalmar Metabolic Syndrome Program) | 1 year                          | Simulation until 85 years of age | Men:<br>Low risk: Euro 11,213/QALY<br>Medium risk: Euro 5,052/QALY<br>High risk: Euro 3,305/QALY<br>Women:<br>Low risk: Euro 10,698/QALY<br>Medium risk: Euro 7,379/QALY<br>High risk: Euro 18,739/QALY | Men:<br>Low risk: Euro 7,276/QALY<br>Medium risk: Cost saving<br>High risk: Cost saving<br>Women:<br>Low risk: Euro 7,337/QALY<br>Medium risk: Euro 3,608/QALY<br>High risk: Euro 18,191/QALY | QALY |
| <b>STUDIES INCLUDING NO SCREENING + UNSPECIFIED LIFESTYLE INTERVENTION</b> |             |             |                              |                                                                 |                                                            |                                                                            |                                 |                                  |                                                                                                                                                                                                         |                                                                                                                                                                                               |      |
| <b>Jacobs Van Der Brugge</b>                                               | <b>2007</b> | Netherlands | Markov model                 | Dutch population 2004 (16.3 million) for community intervention | Whole adult population for community intervention          | Community intervention                                                     | 5 years community intervention  | 70 years                         | Community intervention: Euro 3100-3900/QALY                                                                                                                                                             | -                                                                                                                                                                                             | QALY |
|                                                                            |             |             |                              | 200,000                                                         | Obese adults aged 30-70 years for healthcare intervention  | Healthcare intervention: Lifestyle program                                 | 3 years healthcare intervention | 70 years                         | Healthcare intervention: Euro 3900-5500/QALY                                                                                                                                                            | -                                                                                                                                                                                             | QALY |

### APPENDIX 3: COST OF LIFESTYLE PROGRAMS IN INCLUDED STUDIES

| <b>US DIABETES PREVENTION PROGRAM - COSTS OF LIFESTYLE PROGRAM (37)</b> |                       |                   |                        |                     |                   |                    |                        |                     |                 |                    |                        |                     |                 |
|-------------------------------------------------------------------------|-----------------------|-------------------|------------------------|---------------------|-------------------|--------------------|------------------------|---------------------|-----------------|--------------------|------------------------|---------------------|-----------------|
| <u>Activity</u>                                                         | <u>Staff type</u>     | YEAR 1            |                        |                     |                   | YEAR 2             |                        |                     |                 | YEAR 3             |                        |                     |                 |
|                                                                         |                       | Volume of contact | Time per contact (hrs) | Staff cost per hour | Total cost p.a.   | Volume of contacts | Time per contact (hrs) | Staff cost per hour | Total cost p.a. | Volume of contacts | Time per contact (hrs) | Staff cost per hour | Total cost p.a. |
|                                                                         |                       |                   |                        |                     |                   |                    |                        |                     |                 |                    |                        |                     |                 |
| Baseline history and physical examination                               | GP                    | 1                 | 1                      | £ 162.00            | £ 162.00          |                    |                        |                     | £ -             |                    |                        |                     | £ -             |
| Annual nurse review and blood tests                                     | District nurse        |                   |                        |                     |                   | 1                  | 0.33                   | 0.3                 | £ 11.67         | 1                  | 0.33                   | 0.3                 | £ 11.67         |
| Core curriculum                                                         | Care manager (Band 5) | 16                | 1                      | £ 45.00             | £ 720.00          |                    |                        |                     | £ -             |                    |                        |                     | £ -             |
| Supervised activity session                                             | Care manager (Band 5) | 2.562             | 1                      | £ 45.00             | £ 115.29          | 2.562              | 1                      | £ 45.00             | £ 115.29        | 2.562              | 1                      | £ 45.00             | £ 115.29        |
|                                                                         | Trainer (Band 5)      | 1.708             | 1                      | £ 45.00             | £ 76.86           | 1.708              | 1                      | £ 45.00             | £ 76.86         | 1.708              | 1                      | £ 45.00             | £ 76.86         |
| Lifestyle group sessions                                                | Care manager (Band 5) | 0.36              | 1.25                   | £ 45.00             | £ 20.25           | 0.72               | 1.25                   | £ 45.00             | £ 40.50         | 0.72               | 1.25                   | £ 45.00             | £ 40.50         |
| In-person visits                                                        | Care manager (Band 5) | 7.65              | 0.58                   | £ 45.00             | £ 199.67          | 12.33              | 0.58                   | £ 45.00             | £ 321.81        | 12.33              | 0.58                   | £ 45.00             | £ 321.81        |
| Phonecalls                                                              | Care manager (Band 5) | 2.32              | 0.25                   | £ 45.00             | £ 26.10           | 2.66               | 0.25                   | £ 45.00             | £ 29.93         | 2.66               | 0.25                   | £ 45.00             | £ 29.93         |
| Reminder phone calls                                                    | Secretary (Band 4)    | 29.41             | 0.08                   | £ 36.25             | £ 85.29           | 17.45              | 0.08                   | £ 36.25             | £ 50.61         | 17.45              | 0.08                   | £ 36.25             | £ 50.61         |
| Materials                                                               |                       |                   |                        |                     | £ 9.61            |                    |                        |                     | £ -             |                    |                        |                     | £ -             |
| Tool box                                                                |                       |                   |                        |                     | £ 102.00          |                    |                        |                     | £ 105.00        |                    |                        |                     |                 |
| <b>Intervention cost p.a.</b>                                           |                       |                   |                        |                     | <b>£ 1,517.06</b> |                    |                        |                     | <b>£ 751.66</b> |                    |                        |                     | <b>£ 646.66</b> |

|                                                                             |                   |                    |                        |                     |                 |                    |                        |                     |                 |                    |                        |                     |                   |
|-----------------------------------------------------------------------------|-------------------|--------------------|------------------------|---------------------|-----------------|--------------------|------------------------|---------------------|-----------------|--------------------|------------------------|---------------------|-------------------|
| <b>Total intervention cost</b>                                              |                   |                    |                        |                     |                 |                    |                        |                     |                 |                    |                        |                     | <b>£ 2,915.39</b> |
| <b>INDIAN DIABETES PREVENTION PROGRAM - COSTS OF LIFESTYLE PROGRAM (64)</b> |                   |                    |                        |                     |                 |                    |                        |                     |                 |                    |                        |                     |                   |
|                                                                             |                   | YEAR 1             |                        |                     |                 | YEAR 2             |                        |                     |                 | YEAR 3             |                        |                     |                   |
| <u>Activity</u>                                                             | <u>Staff type</u> | Volume of contacts | Time per contact (hrs) | Staff cost per hour | Total cost p.a. | Volume of contacts | Time per contact (hrs) | Staff cost per hour | Total cost p.a. | Volume of contacts | Time per contact (hrs) | Staff cost per hour | Total cost p.a.   |
| Visits                                                                      | GP                | 4                  | 0.5                    | £ 162.00            | £ 324.00        | 4                  | 0.5                    | £ 162.0             | £ 324.00        | 4                  | 0.5                    | £ 162.0             | £ 324.00          |
|                                                                             | Social worker     | 4                  | 0.75                   | £ 62.86             | £ 188.57        | 4                  | 0.75                   | £ 62.86             | £ 188.57        | 4                  | 0.75                   | £ 62.86             | £ 188.57          |
|                                                                             | Dietician         | 4                  | 0.75                   | £ 62.86             | £ 188.57        | 4                  | 0.75                   | £ 62.86             | £ 188.57        | 4                  | 0.75                   | £ 62.86             | £ 188.57          |
|                                                                             | Helper            | 4                  | 0.5                    | £ 36.25             | £ 72.50         | 4                  | 0.5                    | £ 36.25             | £ 72.50         | 4                  | 0.5                    | £ 36.25             | £ 72.50           |
|                                                                             | Technician        | 2                  | 0.16                   | £ 36.25             | £ 11.60         | 2                  | 0.16                   | £ 36.25             | £ 11.60         | 2                  | 0.16                   | £ 36.25             | £ 11.60           |
| Phone calls – inbound                                                       | Social worker     | 5.4                | 0.25                   | £ 62.86             | £ 84.86         | 2.25               | 0.25                   | £ 62.86             | £ 35.36         | 2.2                | 0.25                   | £ 62.86             | £ 34.57           |
|                                                                             | Dietician         | 4.8                | 0.25                   | £ 62.86             | £ 75.43         | 1.8                | 0.25                   | £ 62.86             | £ 28.29         | 1.6                | 0.25                   | £ 62.86             | £ 25.14           |
| Phone calls – outbound                                                      | Social worker     | 8                  | 0.41                   | £ 62.86             | £ 206.17        | 8                  | 0.41                   | £ 62.86             | £ 206.17        | 10                 | 0.41                   | £ 62.86             | £ 257.71          |
|                                                                             | Dietician         | 8                  | 0.41                   | £ 62.86             | £ 206.17        | 8                  | 0.41                   | £ 62.86             | £ 206.17        | 10                 | 0.41                   | £ 62.86             | £ 257.71          |
| Reminder calls                                                              | Secretary         | 12                 | 0.05                   | £ 36.25             | £ 21.75         | 12                 | 0.05                   | £ -                 | £ -             | 12                 | 0.05                   | £ -                 | £ -               |
| <b>Intervention cost p.a.</b>                                               |                   |                    |                        |                     | <b>£ 1,380</b>  |                    |                        |                     | <b>£ 1,261</b>  |                    |                        |                     | <b>£ 1,360</b>    |
| <b>Total intervention cost</b>                                              |                   |                    |                        |                     |                 |                    |                        |                     |                 |                    |                        |                     | <b>£ 4,001</b>    |

## APPENDIX 4: BENEFITS OF PREVENTION PROGRAMS

| Study                                                    | Type of intervention                                                      | DALYs averted | Increase in QALYs                                                                                                | Method of calculating QALYs                  | Years free of diabetes | Increased life years gained (years) | Number needed to treat to prevent 1 case of diabetes |
|----------------------------------------------------------|---------------------------------------------------------------------------|---------------|------------------------------------------------------------------------------------------------------------------|----------------------------------------------|------------------------|-------------------------------------|------------------------------------------------------|
| Herman, 2005 - DPP                                       | a. Lifestyle                                                              |               | 0.57                                                                                                             | Self-administered Quality of Wellbeing Index | 11                     | 0.5                                 |                                                      |
|                                                          | b. Metformin                                                              |               | 0.13                                                                                                             |                                              | 3                      | 0.2                                 |                                                      |
| Eddy, 2005                                               | a. DPP lifestyle (in those with IGT and IFG)                              |               | 0.159 (0.276 undiscounted)                                                                                       | Quality of Wellbeing Index                   |                        | 0.288                               |                                                      |
|                                                          | b. DPP metformin                                                          |               | NR                                                                                                               |                                              |                        |                                     |                                                      |
| Diabetes Prevention Programme (DPP) Research Group, 2012 | a. Lifestyle                                                              |               | 0.12 (0.14 undiscounted)                                                                                         | Self-administered Quality of Wellbeing Index |                        |                                     |                                                      |
|                                                          | b. Metformin                                                              |               | 0.02 (0.02 undiscounted)                                                                                         |                                              |                        |                                     |                                                      |
| Ackermann, 2006                                          | DPP lifestyle intervention at either age 50 or 65yrs of target population |               | 0.59 (lifestyle intervention provided to 50 year olds)<br>0.27 (lifestyle intervention provided to 65 year olds) | Self-administered Quality of Wellbeing Index |                        |                                     |                                                      |
| Palmer, 2004                                             | a. Intensive lifestyle change (US DPP)                                    |               |                                                                                                                  |                                              | 1.77-1.82              | 0.06-0.16 (0.21-0.23 undiscounted)  |                                                      |
|                                                          | b. Metformin                                                              |               |                                                                                                                  |                                              | 0.86-0.89              | 0.03-0.07 (0.10-0.11 undiscounted)  |                                                      |
| Palmer, 2012                                             | a. Intensive lifestyle change (US DPP)                                    |               | 0.39                                                                                                             | NA                                           | 5.71                   | 0.69                                |                                                      |
|                                                          | b. Metformin                                                              |               | 0.12                                                                                                             | NA                                           | 2.47                   | 0.3                                 |                                                      |



|                    |                                                        |  |                                                                  |                                                               |  |                                                                                                |     |
|--------------------|--------------------------------------------------------|--|------------------------------------------------------------------|---------------------------------------------------------------|--|------------------------------------------------------------------------------------------------|-----|
| Png, 2014          | 1. Lifestyle (US DPP)                                  |  | 0.05                                                             | Self-administered Quality of Wellbeing Index (used in US DPP) |  |                                                                                                |     |
|                    | 2. Metformin                                           |  | 0.01                                                             |                                                               |  |                                                                                                |     |
| Lindgren, 2007     | Lifestyle intervention (FDPS)                          |  | 0.2                                                              | EQ-5D                                                         |  | 0.18                                                                                           |     |
| Caro, 2004         | a. Lifestyle program (based on FDPS)                   |  |                                                                  |                                                               |  | 0.31                                                                                           |     |
|                    | b. Metformin                                           |  |                                                                  |                                                               |  | 0.14                                                                                           |     |
|                    | c. Acarbose                                            |  |                                                                  |                                                               |  | 0.2                                                                                            |     |
| Ramachandran, 2007 | 1. Lifestyle management                                |  |                                                                  |                                                               |  |                                                                                                | 6.4 |
|                    | 2. Metformin                                           |  |                                                                  |                                                               |  |                                                                                                | 6.9 |
|                    | 3. Lifestyle management and metformin                  |  |                                                                  |                                                               |  |                                                                                                | 6.5 |
| Hoerger, 2007      | 1. Screening and DPP lifestyle program for IFG and IGT |  | 0.040 per screened subject<br>0.099 per subject with prediabetes |                                                               |  | 0.043 (undiscounted) per screened subject<br>0.106 (undiscounted) per subject with prediabetes |     |
|                    | 2. Screening and DPP for IFG or IGT or IFG and IGT     |  | 0.118 per screened subject<br>0.290 per subject with prediabetes |                                                               |  | 0.122 (undiscounted) per screened subject<br>0.300 (undiscounted) per subject with prediabetes |     |
| Icks, 2007         | 1. Screening and DPP lifestyle program                 |  |                                                                  |                                                               |  |                                                                                                | 4.3 |

|                 |                                                                           |  |                                                                                           |                                              |  |                                                                                        |      |
|-----------------|---------------------------------------------------------------------------|--|-------------------------------------------------------------------------------------------|----------------------------------------------|--|----------------------------------------------------------------------------------------|------|
|                 | 2. Screening and metformin                                                |  |                                                                                           |                                              |  |                                                                                        | 27.9 |
| Schaufler, 2010 | 1. Screening and US DPP lifestyle program                                 |  | 2.91<br>(undiscounted )                                                                   | Self-Administered Quality of Wellbeing Index |  |                                                                                        |      |
|                 | 2. Screening and metformin                                                |  | 2.83<br>(undiscounted )                                                                   | Self-Administered Quality of Wellbeing Index |  |                                                                                        |      |
| Mortaz, 2012    | 3-yearly screening with FPG and USDPP lifestyle intervention or metformin |  | 0.306                                                                                     | EQ-5D                                        |  |                                                                                        |      |
| Liu, 2012       | a. Screening with diet intervention                                       |  | Initiation age 25 yrs: 3.33<br>Initiation age 40 yrs: 2.59<br>Initiation age 60 yrs: 0.56 |                                              |  | Initiation age 25 yrs: 1.7<br>Initiation age 40 yrs: 0.5<br>Initiation age 60 yrs: 0.1 |      |
|                 | b. Screening with exercise intervention                                   |  | Initiation age 25 yrs: 3.33<br>Initiation age 40 yrs: 2.58<br>Initiation age 60 yrs: 0.56 |                                              |  | Initiation age 25 yrs: 1.7<br>Initiation age 40 yrs: 0.5<br>Initiation age 60 yrs: 0.1 |      |
|                 | c. Screening with diet and lifestyle intervention                         |  | Initiation age 25 yrs: 3.33<br>Initiation age 40 yrs: 2.59<br>Initiation age 60 yrs: 0.56 |                                              |  | Initiation age 25 yrs: 1.7<br>Initiation age 40 yrs: 0.5<br>Initiation age 60 yrs: 0.1 |      |
|                 | d. Screening alone                                                        |  | Initiation age 25 yrs: 2.40<br>Initiation age 40 yrs: 1.37<br>Initiation age 60 yrs: 0.33 |                                              |  | Initiation age 25 yrs: 1.2<br>Initiation age 40 yrs: 0.1<br>Initiation age 60 yrs: 0   |      |

|                 |                                                          |                                 |                                                                                                |                 |                                                    |                                                       |  |
|-----------------|----------------------------------------------------------|---------------------------------|------------------------------------------------------------------------------------------------|-----------------|----------------------------------------------------|-------------------------------------------------------|--|
| Gilles, 2008    | 1. Screening for T2DM only                               |                                 | 0.03 (-0.02-0.09)<br>Undiscounted: 0.07 (-0.03-0.18)                                           | EQ-5D           |                                                    | 0.02 (-0.01 - 0.05)<br>Undiscounted: 0.06 (0.02-0.12) |  |
|                 | 2. Screening for T2DM and IGT and lifestyle intervention |                                 | 0.09 (0.03-0.17)<br>Undiscounted: 0.22 (0.08-0.36)                                             |                 | 0.17 (0.11-0.23)<br>Undiscounted: 0.33 (0.21-0.43) | 0.05 (0.03-0.08)<br>Undiscounted: 0.15 (0.08-0.22)    |  |
|                 | 3. Screening for T2DM, IGT and treat with metformin      |                                 | 0.07 (0.01-0.15)<br>Undiscounted: 0.17 (0.03-0.32)                                             |                 | 0.11 (0.06-0.19)<br>Undiscounted: 0.20 (0.10-0.37) | 0.05 (0.02-0.07)<br>Undiscounted: 0.13 (0.06-0.20)    |  |
| Colagiuri, 2008 | Screening + lifestyle intervention                       | 0.10 per person with IGT or IFG |                                                                                                |                 |                                                    |                                                       |  |
| Bertram, 2010   | a Diet plus exercise                                     | 0.05                            |                                                                                                |                 |                                                    |                                                       |  |
|                 | b. Exercise                                              | 0.04                            |                                                                                                |                 |                                                    |                                                       |  |
|                 | c. Diet                                                  | 0.02                            |                                                                                                |                 |                                                    |                                                       |  |
|                 | d. Acarbose                                              | 0.06                            |                                                                                                |                 |                                                    |                                                       |  |
|                 | e. Metformin                                             | 0.04                            |                                                                                                |                 |                                                    |                                                       |  |
|                 | f. Orlistat                                              | 0.07                            |                                                                                                |                 |                                                    |                                                       |  |
|                 | g. Metformin plus diet and exercise                      | 0.01                            |                                                                                                |                 |                                                    |                                                       |  |
| Neumann, 2011   | Group lifestyle intervention                             |                                 | 30 years of age:<br>Men: 0.02,<br>Women: 0.03<br>50 years of age:<br>Men: 0.03,<br>Women: 0.02 | SF-6D and EQ-5D |                                                    |                                                       |  |

|                              |                                                                           |  |                                                                                                       |                                              |  |                                                                                                      |                                                                       |
|------------------------------|---------------------------------------------------------------------------|--|-------------------------------------------------------------------------------------------------------|----------------------------------------------|--|------------------------------------------------------------------------------------------------------|-----------------------------------------------------------------------|
|                              |                                                                           |  | 70 years of age:<br>Men: 0.02,<br>Women: 0.02                                                         |                                              |  |                                                                                                      |                                                                       |
| Smith, 2010                  | Modified DPP                                                              |  | 0.01                                                                                                  | Not specified                                |  |                                                                                                      |                                                                       |
| Feldman, 2013                | Primary care -based lifestyle program (Kalmar Metabolic Syndrome Program) |  | 0.05-0.14                                                                                             | Not specified                                |  | 0.3                                                                                                  |                                                                       |
| Jacobs Van der Bruggen, 2007 | 1. Community intervention                                                 |  | 0.006-0.039                                                                                           | Not specified                                |  | 0.007-0.043                                                                                          | 1500-300                                                              |
|                              | 2. Healthcare intervention                                                |  | 0.27-1.17                                                                                             | Not specified                                |  | 0.32-1.35                                                                                            | 30-7                                                                  |
| Irvine, 2011                 | Lifestyle intervention (UEA-IFG)                                          |  | 0.003                                                                                                 | EQ-5D                                        |  |                                                                                                      |                                                                       |
| Sagarra, 2013                | Individual and group lifestyle program                                    |  | 0.12                                                                                                  | 15D                                          |  |                                                                                                      |                                                                       |
| Zhuo, 2012                   | Community based lifestyle intervention (PLAN4WARD)                        |  | 0.03 per participant identified as prediabetic<br>0.053 per person participating in lifestyle program |                                              |  | 0.04 per participant identified as prediabetic<br>0.08 per person participating in lifestyle program | 14.24                                                                 |
| Herman, 2013                 | 1. USDPP and USDPPPOS lifestyle program                                   |  | 0.15                                                                                                  | Self-administered Quality of Wellbeing Index |  |                                                                                                      |                                                                       |
|                              | 2. Metformin and USDPPPOS lifestyle program                               |  | 0.09                                                                                                  |                                              |  |                                                                                                      |                                                                       |
| Dall, 2015                   | DPPOS                                                                     |  | 0.39 using ADA screening criteria<br>0.41 using                                                       | EQ-5D                                        |  | 0.36 using ADA screening criteria                                                                    | 3.9 using the ADA screening criteria<br>4.2 using the USPSTF criteria |

|  |  |  |                 |  |  |                            |  |
|--|--|--|-----------------|--|--|----------------------------|--|
|  |  |  | USPSTF criteria |  |  | 0.45 using USPSTF criteria |  |
|--|--|--|-----------------|--|--|----------------------------|--|

## APPENDIX 5: ASSESSMENT OF QUALITY, RELEVANCE AND CREDIBILITY

| QUESTIONS                             | HELPER QUESTIONS              | SPECIFIC ELEMENTS EXAMINED | Herman, 2005                                                 | Eddy, 2005               | DPPRG, 2012                                                  | Ackermann, 2006 | Palmer 2004                                                                            |
|---------------------------------------|-------------------------------|----------------------------|--------------------------------------------------------------|--------------------------|--------------------------------------------------------------|-----------------|----------------------------------------------------------------------------------------|
| <b>ASSESSMENT OF RELEVANCE</b>        |                               |                            |                                                              |                          |                                                              |                 |                                                                                        |
| <b>1. Is the population relevant?</b> | Are the demographics similar? | Age, ethnicity, gender     | 45% members of minority groups<br>Age >25 years<br>68% women | Not reported             | 45% members of minority groups<br>Age >25 years<br>68% women | 50 years of age | Population based on the USDPP:<br>Mean age 50.6 years<br>32.2% men<br>Mean BMI 34kg/m2 |
|                                       | Are risk factors similar?     | Type of pre-diabetes, BMI  | IGT and IFG, BMI>24kg/m2                                     | IGT and IFG, BMI>24kg/m2 | IGT and IFG, BMI>24kg/m2                                     | IGT             | IGT                                                                                    |

|                                                  |                                                                                           |                              |                                                                                     |                                                                                   |                                                                                                                                                                                                                       |                                                         |                                                                                  |
|--------------------------------------------------|-------------------------------------------------------------------------------------------|------------------------------|-------------------------------------------------------------------------------------|-----------------------------------------------------------------------------------|-----------------------------------------------------------------------------------------------------------------------------------------------------------------------------------------------------------------------|---------------------------------------------------------|----------------------------------------------------------------------------------|
|                                                  | Are behaviors similar?                                                                    | Compliance with intervention | 72% participants took at least 80% of required metformin                            | Not reported                                                                      | Years 1-3: 72% participants took at least 80% of required metformin<br>Years 4+: 88% eligible participants enrolled, 40% of lifestyle, 58% of metformin and 57% of placebo participants attended at least one session | 10% p.a. drop out rate modelled in sensitivity analysis | Data drawn from USDPP<br>Additional non-participation/non-adherence not modelled |
|                                                  | Is the medical condition similar?                                                         |                              | Yes                                                                                 | Yes                                                                               | Yes                                                                                                                                                                                                                   | Yes                                                     | Yes                                                                              |
| <b>2 Are any critical interventions missing?</b> | Does the intervention analyzed in the model match the intervention you are interested in? | Type of intervention         | 1. Lifestyle intervention (duration 2.8 years, USDPP)<br>2. Metformin<br>3. Placebo | 1. Lifestyle intervention over 2.8 years (USDPP)<br>2. Metformin<br>3. Usual care | 1. Lifestyle intervention over 10 years (USDPP/DPPOS)<br>2. Metformin<br>3. Usual care                                                                                                                                | 1. Lifestyle intervention<br>2. Usual care              | 1. Lifestyle intervention (based on USDPP)<br>2. Metformin<br>3. Usual care      |
|                                                  | Have all relevant comparators been considered?                                            |                              | Yes                                                                                 | Yes                                                                               | Yes                                                                                                                                                                                                                   | No, metformin not included                              | Yes                                                                              |

|                                                                   |                                                                   |                                       |                           |                                        |                                        |                           |                                                                                 |
|-------------------------------------------------------------------|-------------------------------------------------------------------|---------------------------------------|---------------------------|----------------------------------------|----------------------------------------|---------------------------|---------------------------------------------------------------------------------|
|                                                                   | Does the background care in the model match yours?                |                                       | US healthcare system      | US healthcare system                   | US healthcare system                   | US healthcare system      | Australia, France, Germany, Switzerland and the United Kingdom's health systems |
| <b>3 Are any relevant outcomes missing?</b>                       | Are the health outcomes relevant to you considered?               |                                       | Yes, QALYs                | Yes, QALYs                             | Yes, QALYs                             | Yes, QALYs                | Yes, LYG                                                                        |
|                                                                   | Are the economic end points relevant to you considered?           |                                       | Yes, \$/QALY              | Yes, \$/QALY                           | Yes, \$/QALY                           | Yes, \$/QALY              | Yes, \$/LYG                                                                     |
| <b>4. Is the context (settings and circumstances) applicable?</b> | Is the geographic location similar?                               |                                       | US                        | US                                     | US                                     | US                        | Australia, France, Germany, Switzerland and the United Kingdom                  |
|                                                                   | Is the time horizon applicable to your decision?                  |                                       | Yes, lifetime simulation  | Yes, 30 years                          | Yes, 10 years                          | Yes, lifetime simulation  | Yes, lifetime                                                                   |
|                                                                   | Is the analytic perspective appropriate to your decision problem? | Health system or societal perspective | Health system perspective | Health system and societal perspective | Health system and societal perspective | Health system perspective | Health system perspective                                                       |
| <b>ASSESSMENT OF CREDIBILITY</b>                                  |                                                                   |                                       |                           |                                        |                                        |                           |                                                                                 |
| <u><b>Validation</b></u>                                          |                                                                   |                                       |                           |                                        |                                        |                           |                                                                                 |

|                                                                                                         |                                                                                                          |  |              |              |                              |              |              |
|---------------------------------------------------------------------------------------------------------|----------------------------------------------------------------------------------------------------------|--|--------------|--------------|------------------------------|--------------|--------------|
| <b>Is external validation of the model sufficient to make its results credible for your decision?</b>   | Has the model been shown to accurately reproduce what was observed in the data used to create the model? |  | Not reported | Yes          | <i>Not a modelling study</i> | Not reported | Not reported |
|                                                                                                         | Has the model been shown to accurately estimate what actually happened in one or more separate studies?  |  | Not reported | Yes          |                              | Not reported | Not reported |
|                                                                                                         | Has the model been shown to accurately forecast what eventually happens in reality?                      |  | Not reported | Not reported |                              | Not reported | Not reported |
| <b>Is internal verification of the model sufficient to make its results credible for your decision?</b> | Have the process of internal verification and its results been documented in detail?                     |  | Not reported | Yes          | <i>Not a modelling study</i> | Not reported | Not reported |
|                                                                                                         | Has the testing been performed systematically?                                                           |  | Not reported | Yes          |                              | Not reported | Not reported |
|                                                                                                         | Does the testing indicate that all the equations are consistent with their data sources?                 |  | Not reported | Yes          |                              | Not reported | Not reported |
|                                                                                                         | Does the testing indicate that the coding has been correctly implemented?                                |  | Not reported | Yes          |                              | Not reported | Not reported |



|                                                                                                     |                                                                                                                   |  |                                      |                                                |                              |                                      |                                      |
|-----------------------------------------------------------------------------------------------------|-------------------------------------------------------------------------------------------------------------------|--|--------------------------------------|------------------------------------------------|------------------------------|--------------------------------------|--------------------------------------|
| <b>Does the model have sufficient face validity to make its results credible for your decision?</b> | Does the model contain all the aspects considered relevant to the decision?                                       |  | Yes                                  | Yes                                            | <i>Not a modelling study</i> | Yes                                  | Yes                                  |
|                                                                                                     | Are all the relevant aspects represented and linked according to the best understanding of their characteristics? |  | Yes                                  | Not reported                                   |                              | Yes                                  | Yes                                  |
|                                                                                                     | Have the best available data sources been used to inform the various aspects?                                     |  | Yes                                  | Not reported                                   |                              | Yes                                  | Yes                                  |
|                                                                                                     | Is the time horizon sufficiently long to account for all relevant aspects of the decision problem?                |  | Yes, lifetime simulation             | Yes, 30 years                                  |                              | Yes - lifetime simulation            | Yes, lifetime simulation             |
|                                                                                                     | Are the results plausible?                                                                                        |  | Yes                                  | No                                             |                              | Yes                                  | Yes                                  |
|                                                                                                     | If others have rated the face validity, did they have a stake in the results?                                     |  | Rating of face validity not reported | Rating of face validity not reported in detail |                              | Rating of face validity not reported | Rating of face validity not reported |
| <b><u>Design</u></b>                                                                                |                                                                                                                   |  |                                      |                                                |                              |                                      |                                      |

|                                                                |                                                                                                                                     |  |                                            |                                            |                              |                                                                                                                                          |                                                      |
|----------------------------------------------------------------|-------------------------------------------------------------------------------------------------------------------------------------|--|--------------------------------------------|--------------------------------------------|------------------------------|------------------------------------------------------------------------------------------------------------------------------------------|------------------------------------------------------|
| Is the design of the model adequate for your decision problem? | Was there a clear, written statement of the decision problem, modeling objective, and scope of the model?                           |  | Yes                                        | Yes                                        | <i>Not a modelling study</i> | Yes                                                                                                                                      | Yes                                                  |
|                                                                | Was there a formal process for developing the model design (e.g. influence diagram, concept map)?                                   |  | Not reported - pre-existing model utilised | Not reported - pre-existing model utilised |                              | Not reported - pre-existing model utilised                                                                                               | Not reported                                         |
|                                                                | Is the model concept and structure consistent with, and adequate to address, the decision problem/objective and the policy context? |  | Yes                                        | Yes                                        |                              | Yes                                                                                                                                      | Yes                                                  |
|                                                                | Have any assumptions implied by the design of the model been described, and are they reasonable for your decision problem?          |  | Yes                                        | Not reported                               |                              | No - assumption that relative risk reduction continues as long as lifestyle intervention continues (until participant gets T2DM or dies) | No-reversion from IGT to normoglycaemia not modelled |
|                                                                | Is the choice of model type appropriate?                                                                                            |  | Yes                                        | Yes                                        |                              | Yes                                                                                                                                      | Yes                                                  |

|                                                                                      |                                                                                        |                                                         |                                                                                                                                                                                                                    |                                                                                                                                                  |                                                |                                                                                                                                                                     |                                                                                                                                                               |
|--------------------------------------------------------------------------------------|----------------------------------------------------------------------------------------|---------------------------------------------------------|--------------------------------------------------------------------------------------------------------------------------------------------------------------------------------------------------------------------|--------------------------------------------------------------------------------------------------------------------------------------------------|------------------------------------------------|---------------------------------------------------------------------------------------------------------------------------------------------------------------------|---------------------------------------------------------------------------------------------------------------------------------------------------------------|
|                                                                                      | Were key uncertainties in model structure identified and their implications discussed? |                                                         | Yes                                                                                                                                                                                                                | Yes                                                                                                                                              |                                                | Yes                                                                                                                                                                 | Yes                                                                                                                                                           |
| <b><u>Data</u></b>                                                                   |                                                                                        |                                                         |                                                                                                                                                                                                                    |                                                                                                                                                  |                                                |                                                                                                                                                                     |                                                                                                                                                               |
| <b>Are the data used in populating the model suitable for your decision problem?</b> | All things considered, do you agree with the values used for the inputs?               | Duration and extent of impact of lifestyle intervention | Relative risks of T2DM from USDPP<br>Lifestyle intervention provided <b>until onset of T2DM</b> and assumed health and QOL benefits associated with interventions remain constant and persist until diabetes onset | Lifestyle program and metformin assumed to continue to impact T2DM incidence as long as they were provided (up to and after diagnosis with T2DM) | Relative risks of T2DM from USDPP and USDPP OS | Lifestyle intervention provided until onset of T2DM and that health and QOL benefits associated with interventions remain constant and persist until diabetes onset | Lifestyle intervention provided for 3 years and benefits in terms of reduction in incidence of T2DM only lasts for 3 years (ie. For duration of intervention) |
|                                                                                      |                                                                                        | Source of cost data                                     | USDPP                                                                                                                                                                                                              | USDPP                                                                                                                                            | USDPP/USDPP OS                                 | USDPP                                                                                                                                                               | Costs of intervention from USDPP<br>Other costs from published data                                                                                           |

|                                                                                              |  |                        |                        |                    |                        |                        |                                                                                                                                   |
|----------------------------------------------------------------------------------------------|--|------------------------|------------------------|--------------------|------------------------|------------------------|-----------------------------------------------------------------------------------------------------------------------------------|
|                                                                                              |  | Source of outcome data | USDPP                  | Not reported       | USDPP/USDPP OS         | USDPP                  | USDPP                                                                                                                             |
|                                                                                              |  | Discount rate          | 3% for costs and QALYs | 3% costs and QALYs | 3% for costs and QALYs | 3% for costs and QALYs | 5% for costs and LYG in Australian, German, Swiss and French analysis<br>1.5% for health outcomes and 6% for costs in UK analysis |
| <b><u>Analysis</u></b>                                                                       |  |                        |                        |                    |                        |                        |                                                                                                                                   |
| <b>Were the analyses performed using the model adequate to inform your decision problem?</b> |  |                        | Yes                    | Yes                | Yes                    | Yes                    | Yes                                                                                                                               |

|                                                                          |                                                                                      |                          |                                                                                                                                                                                                      |                                                                                                                                                                 |                                                        |                                                                                                                                                             |                                                                                                                                                                                                                                                                                                                                                             |
|--------------------------------------------------------------------------|--------------------------------------------------------------------------------------|--------------------------|------------------------------------------------------------------------------------------------------------------------------------------------------------------------------------------------------|-----------------------------------------------------------------------------------------------------------------------------------------------------------------|--------------------------------------------------------|-------------------------------------------------------------------------------------------------------------------------------------------------------------|-------------------------------------------------------------------------------------------------------------------------------------------------------------------------------------------------------------------------------------------------------------------------------------------------------------------------------------------------------------|
| Was there an adequate assessment of the effects of uncertainty?          |                                                                                      | Key sensitivity analyses | Sensitivity analyses:<br>1. Group lifestyle programme<br>2. Generic metformin<br>3. Reduced effectiveness of interventions to 20% and 50% of USDPP to reflect reduced adherence<br>4. Discount rates | Sensitivity analyses:<br>1. Intervention effect<br>2. Size of the health plan<br>3. Discount rate<br>4. Cost of diabetes care<br>5. Turnover of the health plan | No sensitivity analyses as was a within-trial analysis | Sensitivity analyses:<br>1. Group lifestyle programme<br>2. Reduced effectiveness of interventions to 50% of USDPP<br>3. Adherence reduced by 10% each year | Sensitivity analyses:<br>1. Total costs +/- 10%<br>2. Life expectancy +/- 10%<br>3. Rank order stability assessment<br>4. Discount rates (range 0-6%)<br>5. Relative risk T2DM<br>6. Effect duration of intervention<br>7. Relative risk of mortality for IGT and T2DM<br>8. Relative costs of IGT and T2DM<br>9. Intervention costs (80-300% of base case) |
| <b><u>Reporting</u></b>                                                  |                                                                                      |                          |                                                                                                                                                                                                      |                                                                                                                                                                 |                                                        |                                                                                                                                                             |                                                                                                                                                                                                                                                                                                                                                             |
| Was the reporting of the model adequate to inform your decision problem? | Did the report of the analyses provide the results needed for your decision problem? |                          | Yes                                                                                                                                                                                                  | Yes                                                                                                                                                             | Yes                                                    | Yes                                                                                                                                                         | Yes                                                                                                                                                                                                                                                                                                                                                         |
|                                                                          | Was adequate nontechnical documentation freely accessible to any interested reader?  |                          | Yes                                                                                                                                                                                                  | Yes                                                                                                                                                             | Yes                                                    | Yes                                                                                                                                                         | Yes                                                                                                                                                                                                                                                                                                                                                         |

|                                                                                          |                                                                                                                                                                         |  |     |     |     |     |     |
|------------------------------------------------------------------------------------------|-------------------------------------------------------------------------------------------------------------------------------------------------------------------------|--|-----|-----|-----|-----|-----|
|                                                                                          | Was technical documentation, in sufficient detail to allow (potentially) for replication, made available openly or under agreements that protect intellectual property? |  | Yes | No  | Yes | Yes | Yes |
| <b><u>Interpretation</u></b>                                                             |                                                                                                                                                                         |  |     |     |     |     |     |
| <b>Was the interpretation of results fair and balanced?</b>                              |                                                                                                                                                                         |  | Yes | Yes | Yes | Yes | Yes |
| <b><u>Conflict of interests</u></b>                                                      |                                                                                                                                                                         |  |     |     |     |     |     |
| <b>Were there any potential conflicts of interest?</b>                                   |                                                                                                                                                                         |  | No  | No  | No  | No  | No  |
| <b>If there were potential conflicts of interest, were steps taken to address these?</b> |                                                                                                                                                                         |  | NA  | NA  | NA  | NA  | NA  |

**APPENDIX 4 CONTINUED:**

| QUESTIONS                             | HELPER QUESTIONS                     | SPECIFIC ELEMENTS EXAMINED       | Palmer, 2012                           | Png, 2014           | Lindgren, 2007                        | Caro, 2004                               | Ramachandran, 2007                      |
|---------------------------------------|--------------------------------------|----------------------------------|----------------------------------------|---------------------|---------------------------------------|------------------------------------------|-----------------------------------------|
|                                       |                                      |                                  |                                        |                     |                                       |                                          |                                         |
| <b>ASSESSMENT OF RELEVANCE</b>        |                                      |                                  |                                        |                     |                                       |                                          |                                         |
| <b>1. Is the population relevant?</b> | <b>Are the demographics similar?</b> | <b>Age, ethnicity, gender</b>    | <b>Not reported</b>                    | <b>Not reported</b> | <b>Age 60 years</b>                   | <b>Mean age: 54.5 years<br/>50% male</b> | <b>Indian office workers aged 35-55</b> |
|                                       | <b>Are risk factors similar?</b>     | <b>Type of pre-diabetes, BMI</b> | <b>IGT or IFG, overweight or obese</b> | <b>IGT and IFG</b>  | <b>IFG, BMI&gt;25kg/m<sup>2</sup></b> | <b>IGT</b>                               | <b>IGT</b>                              |

|                                           |                                                                                           |                              |                                                                               |                                                                             |                                                                                     |                                                                                                         |                                                                                |
|-------------------------------------------|-------------------------------------------------------------------------------------------|------------------------------|-------------------------------------------------------------------------------|-----------------------------------------------------------------------------|-------------------------------------------------------------------------------------|---------------------------------------------------------------------------------------------------------|--------------------------------------------------------------------------------|
|                                           | Are behaviors similar?                                                                    | Compliance with intervention | Compliance with metformin 68-76%<br>Adherence with lifestyle programs: 14-58% | Not reported                                                                | No drop out was assumed<br>Participation rate of 67.5% in circuit training sessions | Non-compliance not explicitly modelled                                                                  | Compliance measured within intervention                                        |
|                                           | Is the medical condition similar?                                                         |                              | Yes                                                                           | Yes                                                                         | Yes                                                                                 | Yes                                                                                                     | Yes                                                                            |
| 2 Are any critical interventions missing? | Does the intervention analyzed in the model match the intervention you are interested in? | Type of intervention         | 1. Lifestyle intervention (based on USDPP)<br>2. Metformin<br>3. Usual care   | 1. Lifestyle intervention (based on USDPP)<br>2. Metformin<br>3. Usual care | 1. Lifestyle intervention (based on 6-year Finnish DPS)<br>2. Usual care            | 1. Lifestyle intervention (based on 6-year Finnish DPS)<br>2. Metformin<br>3. Acarbose<br>4. Usual care | 1. Lifestyle intervention (3 year Indian DPP)<br>2. Metformin<br>3. Usual care |
|                                           | Have all relevant comparators been considered?                                            |                              | Yes                                                                           | Yes                                                                         | No, metformin not considered                                                        | Yes                                                                                                     | Yes                                                                            |
|                                           | Does the background care in the model match yours?                                        |                              | Australian health system                                                      | Singaporean health system                                                   | Swedish health system                                                               | Canadian health system                                                                                  | Indian health system                                                           |



|                                                                                                |                                                                                                          |                                       |                           |                                        |                          |                           |                                    |
|------------------------------------------------------------------------------------------------|----------------------------------------------------------------------------------------------------------|---------------------------------------|---------------------------|----------------------------------------|--------------------------|---------------------------|------------------------------------|
| 3 Are any relevant outcomes missing?                                                           | Are the health outcomes relevant to you considered?                                                      |                                       | Yes, QALYs                | Yes, QALYs                             | Yes, QALYs               | Yes, LYG                  | No, QALYs or DALYs not considered  |
|                                                                                                | Are the economic end points relevant to you considered?                                                  |                                       | Yes, \$/QALY              | Yes, \$/QALY                           | Yes, Euro/QALY           | Yes, \$/LYG               | No, \$/QALY or DALY not considered |
| 4. Is the context (settings and circumstances) applicable?                                     | Is the geographic location similar?                                                                      |                                       | Australia                 | Singapore                              | Sweden                   | Canada                    | India                              |
|                                                                                                | Is the time horizon applicable to your decision?                                                         |                                       | Yes, lifetime             | No - 3 year time horizon               | Yes, lifetime simulation | Yes, 10 year time horizon | No, 3 year analysis                |
|                                                                                                | Is the analytic perspective appropriate to your decision problem?                                        | Health system or societal perspective | Health system perspective | Health system and societal perspective | Societal perspective     | Health system perspective | Health system perspective          |
| ASSESSMENT OF CREDIBILITY                                                                      |                                                                                                          |                                       |                           |                                        |                          |                           |                                    |
| <u>Validation</u>                                                                              |                                                                                                          |                                       |                           |                                        |                          |                           |                                    |
| Is external validation of the model sufficient to make its results credible for your decision? | Has the model been shown to accurately reproduce what was observed in the data used to create the model? |                                       | Not reported              | Not reported                           | Not reported             | Not reported              | Not a modelling study              |
|                                                                                                | Has the model been shown to accurately estimate what actually happened in one or more separate studies?  |                                       | Not reported              | Not reported                           | Not reported             | Not reported              |                                    |

|                                                                                                  |                                                                                                                   |  |              |              |              |              |                              |
|--------------------------------------------------------------------------------------------------|-------------------------------------------------------------------------------------------------------------------|--|--------------|--------------|--------------|--------------|------------------------------|
|                                                                                                  | Has the model been shown to accurately forecast what eventually happens in reality?                               |  | Not reported | Not reported | Not reported | Not reported |                              |
| Is internal verification of the model sufficient to make its results credible for your decision? | Have the process of internal verification and its results been documented in detail?                              |  | Yes          | Not reported | Not reported | Not reported | <i>Not a modelling study</i> |
|                                                                                                  | Has the testing been performed systematically?                                                                    |  | Yes          | Not reported | Not reported | Not reported |                              |
|                                                                                                  | Does the testing indicate that all the equations are consistent with their data sources?                          |  | Not reported | Not reported | Not reported | Not reported |                              |
|                                                                                                  | Does the testing indicate that the coding has been correctly implemented?                                         |  | Not reported | Not reported | Not reported | Not reported |                              |
| Does the model have sufficient face validity to make its results credible for your decision?     | Does the model contain all the aspects considered relevant to the decision?                                       |  | Yes          | Yes          | Yes          | Yes          | <i>Not a modelling study</i> |
|                                                                                                  | Are all the relevant aspects represented and linked according to the best understanding of their characteristics? |  | Yes          | Yes          | Yes          | Yes          |                              |

|                                                                |                                                                                                           |  |                                      |                                      |                                      |                                      |                       |
|----------------------------------------------------------------|-----------------------------------------------------------------------------------------------------------|--|--------------------------------------|--------------------------------------|--------------------------------------|--------------------------------------|-----------------------|
|                                                                | Have the best available data sources been used to inform the various aspects?                             |  | Yes                                  | Yes                                  | Yes                                  | Yes                                  |                       |
|                                                                | Is the time horizon sufficiently long to account for all relevant aspects of the decision problem?        |  | Yes                                  | No - 3 year horizon modelled         | Yes                                  | Yes, 10 years                        |                       |
|                                                                | Are the results plausible?                                                                                |  | Yes                                  | Yes                                  | Yes                                  | Yes                                  |                       |
|                                                                | If others have rated the face validity, did they have a stake in the results?                             |  | Rating of face validity not reported | Rating of face validity not reported | Rating of face validity not reported | Rating of face validity not reported |                       |
| <b><u>Design</u></b>                                           |                                                                                                           |  |                                      |                                      |                                      |                                      |                       |
| Is the design of the model adequate for your decision problem? | Was there a clear, written statement of the decision problem, modeling objective, and scope of the model? |  | Yes                                  | Yes                                  | Yes                                  | Yes                                  | Not a modelling study |
|                                                                | Was there a formal process for developing the model design (e.g.                                          |  | Not reported                         | Not reported                         | Not reported                         | Not reported                         |                       |

|  |                                                                                                                                     |  |     |     |                                             |     |  |
|--|-------------------------------------------------------------------------------------------------------------------------------------|--|-----|-----|---------------------------------------------|-----|--|
|  | influence diagram, concept map)?                                                                                                    |  |     |     |                                             |     |  |
|  | Is the model concept and structure consistent with, and adequate to address, the decision problem/objective and the policy context? |  | Yes | Yes | Yes                                         | Yes |  |
|  | Have any assumptions implied by the design of the model been described, and are they reasonable for your decision problem?          |  | Yes | Yes | No - Reversion from IFG to NGT not modelled | Yes |  |
|  | Is the choice of model type appropriate?                                                                                            |  | Yes | Yes | Yes                                         | Yes |  |

|                                                                               |                                                                                        |                                                         |                                                                               |                                                                                                                                                                  |                                                                      |                                                                                                                                           |                                                                                                 |
|-------------------------------------------------------------------------------|----------------------------------------------------------------------------------------|---------------------------------------------------------|-------------------------------------------------------------------------------|------------------------------------------------------------------------------------------------------------------------------------------------------------------|----------------------------------------------------------------------|-------------------------------------------------------------------------------------------------------------------------------------------|-------------------------------------------------------------------------------------------------|
|                                                                               | Were key uncertainties in model structure identified and their implications discussed? |                                                         | Yes                                                                           | Yes                                                                                                                                                              | Yes                                                                  | Yes                                                                                                                                       |                                                                                                 |
| <b>Data</b>                                                                   |                                                                                        |                                                         |                                                                               |                                                                                                                                                                  |                                                                      |                                                                                                                                           |                                                                                                 |
| Are the data used in populating the model suitable for your decision problem? | All things considered, do you agree with the values used for the inputs?               | Duration and extent of impact of lifestyle intervention | Benefits of lifestyle intervention persist once intervention ends at 10 years | Benefits of lifestyle intervention persist for 3 years which is the duration of the model                                                                        | No effect of lifestyle intervention assumed after intervention ended | Yes - Assumes 100% benefit for 5 years of intervention but increasing underlying risk of transitioning to T2DM (reaching 20% at 10 years) | Yes - Benefits of lifestyle intervention persist for 3 years which is the duration of the model |
|                                                                               |                                                                                        | Source of cost data                                     | DPPOS, Medical Benefits Schedule Australia                                    | Costs of implementing USDPP obtained from National University Hospital Cost Repository Data from Household Expenditure Survey for indirect costs of intervention | Finnish DPS and other literature                                     | Finnish DPS for intervention costs Physician fee schedules, drug formularies, lab fee schedules and published literature for other costs  | Indian DPP                                                                                      |

|                                                                                              |  |                               |                |                        |                        |                            |                                          |
|----------------------------------------------------------------------------------------------|--|-------------------------------|----------------|------------------------|------------------------|----------------------------|------------------------------------------|
|                                                                                              |  | <b>Source of outcome data</b> | DPPOS          | USDPP                  | Literature             | Finnish DPS and US DPP     | Indian DPP                               |
|                                                                                              |  | <b>Discount rate</b>          | No discounting | 3% for costs and QALYs | 3% costs and utilities | 5% for costs and utilities | No discounting of costs                  |
| <b><u>Analysis</u></b>                                                                       |  |                               |                |                        |                        |                            |                                          |
| <b>Were the analyses performed using the model adequate to inform your decision problem?</b> |  |                               | Yes            | Yes                    | Yes                    | Yes                        | No, only NNT not QALYs or DALYs assessed |

|                                                                                 |                                                                                             |                                 |                                                                                                                                                                                                                               |                                                                                                    |                                  |                                                                                                                                                                                                                                                                                                                                                                                  |                                                |
|---------------------------------------------------------------------------------|---------------------------------------------------------------------------------------------|---------------------------------|-------------------------------------------------------------------------------------------------------------------------------------------------------------------------------------------------------------------------------|----------------------------------------------------------------------------------------------------|----------------------------------|----------------------------------------------------------------------------------------------------------------------------------------------------------------------------------------------------------------------------------------------------------------------------------------------------------------------------------------------------------------------------------|------------------------------------------------|
| <b>Was there an adequate assessment of the effects of uncertainty?</b>          |                                                                                             | <b>Key sensitivity analyses</b> | Sensitivity analyses:<br>1. All parameter values +/-10%<br>2. PSA with distributions in the following parameters: costs of T2DM, transition probabilities, relative risk of mortality in IGT and T2DM, health state utilities | Sensitivity analyses:<br>1. Incremental QALYs associated with metformin and lifestyle intervention | No sensitivity analyses reported | Sensitivity analyses:<br>1. Baseline transition probability to T2DM, returning to NGT or reverting to IGT<br>2. Risk reduction of each intervention<br>3. Cost of lifestyle intervention<br>4. prevalence of IGT<br>5. Cost of screening<br>6. Time horizon of analysis<br>7. Duration of treatment<br>8. Discount rate<br>9. Long-term risk of diabetes and impact of treatment | No sensitivity analyses, not a modelling study |
| <b><u>Reporting</u></b>                                                         |                                                                                             |                                 |                                                                                                                                                                                                                               |                                                                                                    |                                  |                                                                                                                                                                                                                                                                                                                                                                                  |                                                |
| <b>Was the reporting of the model adequate to inform your decision problem?</b> | <b>Did the report of the analyses provide the results needed for your decision problem?</b> |                                 | Yes                                                                                                                                                                                                                           | Yes                                                                                                | Yes                              | Yes                                                                                                                                                                                                                                                                                                                                                                              | Yes                                            |

|                                                      |                                                                                                                                                                         |  |     |     |     |     |     |
|------------------------------------------------------|-------------------------------------------------------------------------------------------------------------------------------------------------------------------------|--|-----|-----|-----|-----|-----|
|                                                      | Was adequate nontechnical documentation freely accessible to any interested reader?                                                                                     |  | Yes | Yes | No  | Yes | Yes |
|                                                      | Was technical documentation, in sufficient detail to allow (potentially) for replication, made available openly or under agreements that protect intellectual property? |  | Yes | Yes | No  | No  | Yes |
| <u>Interpretation</u>                                |                                                                                                                                                                         |  |     |     |     |     |     |
| Was the interpretation of results fair and balanced? |                                                                                                                                                                         |  | Yes | Yes | Yes | Yes | Yes |
| <u>Conflict of interests</u>                         |                                                                                                                                                                         |  |     |     |     |     |     |
| Were there any potential conflicts of interest?      |                                                                                                                                                                         |  | No  | No  | No  | Yes | No  |



|                                                                                   |  |  |    |    |    |     |    |
|-----------------------------------------------------------------------------------|--|--|----|----|----|-----|----|
| If there were potential conflicts of interest, were steps taken to address these? |  |  | NA | NA | NA | Yes | NA |
|-----------------------------------------------------------------------------------|--|--|----|----|----|-----|----|

#### APPENDIX 4 CONTINUED:

| QUESTIONS                      | HELPER QUESTIONS              | SPECIFIC ELEMENTS EXAMINED | Hoerger, 2007                                    | Icks, 2007                                    | Schaufler, 2010  | Mortaz, 2012      | Herman, 2013                                                 |
|--------------------------------|-------------------------------|----------------------------|--------------------------------------------------|-----------------------------------------------|------------------|-------------------|--------------------------------------------------------------|
| ASSESSMENT OF RELEVANCE        |                               |                            |                                                  |                                               |                  |                   |                                                              |
| 1. Is the population relevant? | Are the demographics similar? | Age, ethnicity, gender     | Age: 45-74yrs                                    | Age: 60-74 years                              | Age: 35-75 years | Age: 40 years     | 45% members of minority groups<br>Age >25 years<br>68% women |
|                                | Are risk factors similar?     | Type of pre-diabetes, BMI  | IFG and or IGT<br>BMI $\geq$ 25kg/m <sup>2</sup> | IFG and IGT<br>BMI $\geq$ 24kg/m <sup>2</sup> | IGT              | IFG<br>Overweight | IGT and IFG,<br>BMI $\geq$ 24kg/m <sup>2</sup>               |

|                                                  |                                                                                                  |                                     |                                                                                                                 |                                                                                                |                                                                                            |                                                                                |                                                                                                                           |
|--------------------------------------------------|--------------------------------------------------------------------------------------------------|-------------------------------------|-----------------------------------------------------------------------------------------------------------------|------------------------------------------------------------------------------------------------|--------------------------------------------------------------------------------------------|--------------------------------------------------------------------------------|---------------------------------------------------------------------------------------------------------------------------|
|                                                  | <b>Are behaviors similar?</b>                                                                    | <b>Compliance with intervention</b> | No lack of compliance modelled (50% non entry into intervention from screening modeled in sensitivity analysis) | 30% attend screening test, 40% participate in lifestyle intervention, 59% comply with meformin | 30% participation in screening Participation in or compliance with intervention not stated | Non-compliance with intervention and non-attendance of screening not specified | Only adherent participants included                                                                                       |
|                                                  | <b>Is the medical condition similar?</b>                                                         |                                     | Yes                                                                                                             | Yes                                                                                            | Yes                                                                                        | Yes                                                                            | Yes                                                                                                                       |
| <b>2 Are any critical interventions missing?</b> | <b>Does the intervention analyzed in the model match the intervention you are interested in?</b> | <b>Type of intervention</b>         | 1. Lifestyle intervention (US DPP)<br>2. Usual care                                                             | 1. Lifestyle intervention (US DPP)<br>2. Metformin<br>3. Usual care                            | 1. Lifestyle intervention (US DPP)<br>2. Metformin<br>3. Usual care                        | 1. Lifestyle intervention (US DPP)<br>2. Metformin<br>3. Usual care            | 1. Lifestyle intervention (US DPP)<br>2. Lifestyle intervention (USDPP in groups format)<br>3. Metformin<br>4. Usual care |
|                                                  | <b>Have all relevant comparators been considered?</b>                                            |                                     | Metformin considered in sensitivity analysis                                                                    | Yes                                                                                            | Yes                                                                                        | Yes                                                                            | Yes                                                                                                                       |
|                                                  | <b>Does the background care in the model match yours?</b>                                        |                                     | US health system                                                                                                | German health system                                                                           | German health system                                                                       | Canadian health system                                                         | US health system                                                                                                          |

|                                                                                                |                                                                                                          |                                       |                                                                              |                                               |                           |                           |                                                 |
|------------------------------------------------------------------------------------------------|----------------------------------------------------------------------------------------------------------|---------------------------------------|------------------------------------------------------------------------------|-----------------------------------------------|---------------------------|---------------------------|-------------------------------------------------|
| 3 Are any relevant outcomes missing?                                                           | Are the health outcomes relevant to you considered?                                                      |                                       | Yes, QALY, LYG and cumulative diabetes incidence                             | No, only report cost per case of T2DM avoided | Yes                       | Yes                       | Yes, QALY                                       |
|                                                                                                | Are the economic end points relevant to you considered?                                                  |                                       | Yes, \$/QALY                                                                 | No                                            | Yes                       | Yes                       | Yes, \$/QALY                                    |
| 4. Is the context (settings and circumstances) applicable?                                     | Is the geographic location similar?                                                                      |                                       | US                                                                           | Germany                                       | Germany                   | Canada                    | US                                              |
|                                                                                                | Is the time horizon applicable to your decision?                                                         |                                       | Yes, lifetime simulation                                                     | No, 3 year model                              | Yes, lifetime             | Yes, 10 years             | Yes, 10 years                                   |
|                                                                                                | Is the analytic perspective appropriate to your decision problem?                                        | Health system or societal perspective | Health system perspective                                                    | Health system and societal perspective        | Health system perspective | Health system perspective | Health system and modified societal perspective |
| ASSESSMENT OF CREDIBILITY                                                                      |                                                                                                          |                                       |                                                                              |                                               |                           |                           |                                                 |
| <u>Validation</u>                                                                              |                                                                                                          |                                       |                                                                              |                                               |                           |                           |                                                 |
| Is external validation of the model sufficient to make its results credible for your decision? | Has the model been shown to accurately reproduce what was observed in the data used to create the model? |                                       | Used previously published diabetes model, additional validation not reported | Not reported                                  | Yes                       | Not reported              | Not a modelling study                           |
|                                                                                                | Has the model been shown to accurately estimate what actually happened in one or more separate studies?  |                                       | Not reported                                                                 | Not reported                                  | Yes                       | Not reported              |                                                 |

|                                                                                                  |                                                                                                                   |  |                                                                              |              |              |              |                       |
|--------------------------------------------------------------------------------------------------|-------------------------------------------------------------------------------------------------------------------|--|------------------------------------------------------------------------------|--------------|--------------|--------------|-----------------------|
|                                                                                                  | Has the model been shown to accurately forecast what eventually happens in reality?                               |  | Not reported                                                                 | Not reported | Not reported | Not reported |                       |
| Is internal verification of the model sufficient to make its results credible for your decision? | Have the process of internal verification and its results been documented in detail?                              |  | Used previously published diabetes model, additional validation not reported | Not reported | Yes          | Not reported | Not a modelling study |
|                                                                                                  | Has the testing been performed systematically?                                                                    |  | Not reported                                                                 | Not reported | Yes          | Not reported |                       |
|                                                                                                  | Does the testing indicate that all the equations are consistent with their data sources?                          |  | Not reported                                                                 | Not reported | Not reported | Not reported |                       |
|                                                                                                  | Does the testing indicate that the coding has been correctly implemented?                                         |  | Not reported                                                                 | Not reported | Yes          | Not reported |                       |
| Does the model have sufficient face validity to make its results credible for your decision?     | Does the model contain all the aspects considered relevant to the decision?                                       |  | Yes                                                                          | Yes          | Yes          | Yes          | Not a modelling study |
|                                                                                                  | Are all the relevant aspects represented and linked according to the best understanding of their characteristics? |  | Yes                                                                          | Yes          | Yes          | Yes          |                       |

|                                                                |                                                                                                           |  |                                      |                                      |                                      |                                      |                              |
|----------------------------------------------------------------|-----------------------------------------------------------------------------------------------------------|--|--------------------------------------|--------------------------------------|--------------------------------------|--------------------------------------|------------------------------|
|                                                                | Have the best available data sources been used to inform the various aspects?                             |  | Yes                                  | Yes                                  | Yes                                  | Yes                                  |                              |
|                                                                | Is the time horizon sufficiently long to account for all relevant aspects of the decision problem?        |  | Yes                                  | No, 3 years                          | Yes, lifetime                        | Yes, 10 years                        |                              |
|                                                                | Are the results plausible?                                                                                |  | Yes                                  | Yes                                  | Yes                                  | Yes                                  |                              |
|                                                                | If others have rated the face validity, did they have a stake in the results?                             |  | Rating of face validity not reported | Rating of face validity not reported | Rating of face validity not reported | Rating of face validity not reported |                              |
| <b><u>Design</u></b>                                           |                                                                                                           |  |                                      |                                      |                                      |                                      |                              |
| Is the design of the model adequate for your decision problem? | Was there a clear, written statement of the decision problem, modeling objective, and scope of the model? |  | Yes                                  | Yes                                  | Yes                                  | Yes                                  | <i>Not a modelling study</i> |
|                                                                | Was there a formal process for developing the model design (e.g.                                          |  | Not reported                         | Not reported                         | Not reported                         | Not reported                         |                              |

|  |                                                                                                                                     |  |                                                                                                                                                            |                                         |                                              |                                                                            |  |
|--|-------------------------------------------------------------------------------------------------------------------------------------|--|------------------------------------------------------------------------------------------------------------------------------------------------------------|-----------------------------------------|----------------------------------------------|----------------------------------------------------------------------------|--|
|  | influence diagram, concept map)?                                                                                                    |  |                                                                                                                                                            |                                         |                                              |                                                                            |  |
|  | Is the model concept and structure consistent with, and adequate to address, the decision problem/objective and the policy context? |  | Yes                                                                                                                                                        | No, transition back to NGT not modelled | Not clear of transition back to NGT modelled | No, transition back to NGT not modelled                                    |  |
|  | Have any assumptions implied by the design of the model been described, and are they reasonable for your decision problem?          |  | Continuation of lifestyle intervention as long as participant has prediabetes , assumption that risk reduction continues as long as intervention continues | Yes                                     | Yes                                          | Unclear how different interventions (lifestyle and metformin) are modelled |  |
|  | Is the choice of model type appropriate?                                                                                            |  | Yes                                                                                                                                                        | Yes                                     | Yes                                          | Yes                                                                        |  |

|                                                                                      |                                                                                        |                                                                |                                                                                                                                                                                            |                                                 |                                                                                                       |                                                                            |                                                                                                                                                     |
|--------------------------------------------------------------------------------------|----------------------------------------------------------------------------------------|----------------------------------------------------------------|--------------------------------------------------------------------------------------------------------------------------------------------------------------------------------------------|-------------------------------------------------|-------------------------------------------------------------------------------------------------------|----------------------------------------------------------------------------|-----------------------------------------------------------------------------------------------------------------------------------------------------|
|                                                                                      | Were key uncertainties in model structure identified and their implications discussed? |                                                                | Yes                                                                                                                                                                                        | Yes                                             | Yes                                                                                                   | No, limited sensitivity analyses relating mainly to frequency of screening |                                                                                                                                                     |
| <b>Data</b>                                                                          |                                                                                        |                                                                |                                                                                                                                                                                            |                                                 |                                                                                                       |                                                                            |                                                                                                                                                     |
| <b>Are the data used in populating the model suitable for your decision problem?</b> | <b>All things considered, do you agree with the values used for the inputs?</b>        | <b>Duration and extent of impact of lifestyle intervention</b> | No - Duration and extent of impact likely overstated: maintained at 55.8% relative risk reduction as long as intervention continues (which is as long as the participant has pre-diabetes) | Duration of impact: 3 years in line with US DPP | Extent of impact based on literature review<br>Duration of impact not stated                          | No, Duration of impact not stated                                          | Duration and extent of impact based on US DPP/DPPOS. However group-based lifestyle program was assumed to be as effective as the individual program |
|                                                                                      |                                                                                        | <b>Source of cost data</b>                                     | USDPP                                                                                                                                                                                      | USDPP, German healthcare system                 | USDPP Doctors fee scale for the German SHI and pharmaceutical prices and German cost of illness study | Report for the Ontario Ministry of Health and Long-term Care               | USDPP/DPPOS                                                                                                                                         |
|                                                                                      |                                                                                        | <b>Source of outcome data</b>                                  | USDPP                                                                                                                                                                                      | USDPP                                           | USDPP                                                                                                 | USDPP Not stated for QALYs                                                 | USDPP/DPPOS                                                                                                                                         |

|                                                                                              |  |                                 |                                                                                                                                                                                                                                                                                                                                 |                                                                                                                                                                                         |                                                                                                                                                                                                                                               |                                                    |                                                                                                |
|----------------------------------------------------------------------------------------------|--|---------------------------------|---------------------------------------------------------------------------------------------------------------------------------------------------------------------------------------------------------------------------------------------------------------------------------------------------------------------------------|-----------------------------------------------------------------------------------------------------------------------------------------------------------------------------------------|-----------------------------------------------------------------------------------------------------------------------------------------------------------------------------------------------------------------------------------------------|----------------------------------------------------|------------------------------------------------------------------------------------------------|
|                                                                                              |  | <b>Discount rate</b>            | 3% for costs and QALYs                                                                                                                                                                                                                                                                                                          | No discounting                                                                                                                                                                          | 5% costs, no discounting of QALYs                                                                                                                                                                                                             | 3% for costs and benefits                          | 3% for costs and benefits in health system perspective<br>Societal perspective<br>undiscounted |
| <b><u>Analysis</u></b>                                                                       |  |                                 |                                                                                                                                                                                                                                                                                                                                 |                                                                                                                                                                                         |                                                                                                                                                                                                                                               |                                                    |                                                                                                |
| <b>Were the analyses performed using the model adequate to inform your decision problem?</b> |  |                                 | Yes                                                                                                                                                                                                                                                                                                                             | Yes                                                                                                                                                                                     | Yes                                                                                                                                                                                                                                           | Yes                                                | Yes                                                                                            |
| <b>Was there an adequate assessment of the effects of uncertainty?</b>                       |  | <b>Key sensitivity analyses</b> | Sensitivity analyses:<br>1. Prevalence of pre-diabetes<br>2. Different age groups<br>3. Repeated screening every 3 years<br>4. Screening and diagnostic test costs<br>5. Different diagnostic test cut-offs<br>6. Metformin<br>7. Group lifestyle program<br>8. 20% less relative risk reduction of lifestyle program<br>9. 50% | Sensitivity analyses:<br>1. Participation rates in screening and intervention<br>2. Prevalence of IGT and T2DM<br>3. relative risk of T2DM in control group<br>4. Costs of patient time | Sensitivity analyses:<br>1. Costs of screening and intervention<br>2. Discount rate for costs<br>3. Discount rate for utilities<br>4. Participation in intervention<br>5. No effect of early detection on disease progression<br>6. Metformin | Sensitivity analyses:<br>1. Frequency of screening | No sensitivity analyses reported                                                               |



|                                                                                 |                                                                                             |  |                            |     |     |     |                                                                           |
|---------------------------------------------------------------------------------|---------------------------------------------------------------------------------------------|--|----------------------------|-----|-----|-----|---------------------------------------------------------------------------|
|                                                                                 |                                                                                             |  | enrollment in intervention |     |     |     |                                                                           |
| <b><u>Reporting</u></b>                                                         |                                                                                             |  |                            |     |     |     |                                                                           |
| <b>Was the reporting of the model adequate to inform your decision problem?</b> | <b>Did the report of the analyses provide the results needed for your decision problem?</b> |  | Yes                        | Yes | Yes | Yes | Yes                                                                       |
|                                                                                 | <b>Was adequate nontechnical documentation freely accessible to any interested reader?</b>  |  | Yes                        | Yes | Yes | No  | In previous publications from the same trial, but not in this publication |

|                                                                                   |                                                                                                                                                                         |  |     |     |     |     |            |
|-----------------------------------------------------------------------------------|-------------------------------------------------------------------------------------------------------------------------------------------------------------------------|--|-----|-----|-----|-----|------------|
|                                                                                   | Was technical documentation, in sufficient detail to allow (potentially) for replication, made available openly or under agreements that protect intellectual property? |  | No  | Yes | No  | No  | No         |
| <b><u>Interpretation</u></b>                                                      |                                                                                                                                                                         |  |     |     |     |     |            |
| Was the interpretation of results fair and balanced?                              |                                                                                                                                                                         |  | Yes | Yes | Yes | Yes | Yes        |
| <b><u>Conflict of interests</u></b>                                               |                                                                                                                                                                         |  |     |     |     |     |            |
| Were there any potential conflicts of interest?                                   |                                                                                                                                                                         |  | No  | No  | No  | No  | Not stated |
| If there were potential conflicts of interest, were steps taken to address these? |                                                                                                                                                                         |  | NA  | NA  | NA  | NA  | NA         |

APPENDIX 4 CONTINUED:

| QUESTIONS                      | HELPER QUESTIONS              | SPECIFIC ELEMENTS EXAMINED | Liu, 2013                           | Gilles, 2008               | Colaguirri, 2008                                                             | Bertram, 2010                                                                                                           | Neumann, 2011                                                  |
|--------------------------------|-------------------------------|----------------------------|-------------------------------------|----------------------------|------------------------------------------------------------------------------|-------------------------------------------------------------------------------------------------------------------------|----------------------------------------------------------------|
|                                |                               |                            |                                     |                            |                                                                              |                                                                                                                         |                                                                |
| ASSESSMENT OF RELEVANCE        |                               |                            |                                     |                            |                                                                              |                                                                                                                         |                                                                |
| 1. Is the population relevant? | Are the demographics similar? | Age, ethnicity, gender     | Age: 25-74 years Chinese population | Age 45 years UK population | 55-74 years Australian population and 45-54 year old people with BMI>30kg/m2 | Age >55 years or age >45 years with risk factors (BMI, blood pressure, family history of T2DM etc.) or high risk groups | Based on population in Saxony, Germany                         |
|                                | Are risk factors similar?     | Type of pre-diabetes, BMI  | IGT                                 | IGT                        | IFG or IGT                                                                   | IFG and IGT                                                                                                             | FINDRISK score 11-20 or FINDRISK >=21 and no diagnosis of T2DM |

|                                                  |                                                                                                  |                                     |                                                                                    |                                                                                                                       |                                                                     |                                                                                                               |                                                                   |
|--------------------------------------------------|--------------------------------------------------------------------------------------------------|-------------------------------------|------------------------------------------------------------------------------------|-----------------------------------------------------------------------------------------------------------------------|---------------------------------------------------------------------|---------------------------------------------------------------------------------------------------------------|-------------------------------------------------------------------|
|                                                  | <b>Are behaviors similar?</b>                                                                    | <b>Compliance with intervention</b> | 100% compliance assumed in base case, 60% and 80% modelled in sensitivity analyses | 100% compliance with screening and intervention in base case, modelled 70% and 50% compliance in sensitivity analyses | Assumed only 25-50% would participate in screening and intervention | Non-compliance not explicitly modelled                                                                        | Non-compliance not explicitly modelled                            |
|                                                  | <b>Is the medical condition similar?</b>                                                         |                                     | Yes                                                                                | Yes                                                                                                                   | Yes                                                                 | Yes                                                                                                           | Yes                                                               |
| <b>2 Are any critical interventions missing?</b> | <b>Does the intervention analyzed in the model match the intervention you are interested in?</b> | <b>Type of intervention</b>         | 1. Lifestyle intervention (Da Qing)<br>2. Usual care                               | 1. Lifestyle intervention<br>2. Metformin<br>3. Usual care                                                            | 1. Lifestyle intervention (unspecified)<br>2. Usual care            | 1. Diet and exercise<br>2. Exercise<br>3. Diet<br>4. Acarbose<br>5. Metformin<br>6. Orlistat<br>7. Usual care | 1. Lifestyle program (based on PREDIAS and SDPP)<br>2. Usual care |
|                                                  | <b>Have all relevant comparators been considered?</b>                                            |                                     | No, metformin not considered                                                       | Yes                                                                                                                   | No, metformin not modelled                                          | Yes                                                                                                           | No, metformin not modelled                                        |
|                                                  | <b>Does the background care in the model match yours?</b>                                        |                                     | Chinese health system                                                              | UK health system                                                                                                      | Australian health system                                            | Austrian health system                                                                                        | German health system                                              |

|                                                                                                |                                                                                                          |                                       |                      |                           |                                          |                                   |                                                                     |
|------------------------------------------------------------------------------------------------|----------------------------------------------------------------------------------------------------------|---------------------------------------|----------------------|---------------------------|------------------------------------------|-----------------------------------|---------------------------------------------------------------------|
| 3 Are any relevant outcomes missing?                                                           | Are the health outcomes relevant to you considered?                                                      |                                       | Yes, QALY            | Yes, QALYs and LYG        | Yes, DALYs                               | Yes, DALYs                        | Yes, QALYs                                                          |
|                                                                                                | Are the economic end points relevant to you considered?                                                  |                                       | Yes, \$/QALY         | Yes, £/QALY               | Yes, \$/DALY                             | Yes, \$/DALY                      | Yes, Euro/QALY                                                      |
| 4. Is the context (settings and circumstances) applicable?                                     | Is the geographic location similar?                                                                      |                                       | China                | UK health system          | Australia                                | Australia                         | Germany                                                             |
|                                                                                                | Is the time horizon applicable to your decision?                                                         |                                       | Yes, 40 years        | Yes, 50 year simulation   | Yes, 10 year model                       | Yes, until age 100 years or death | Yes, lifetime simulation                                            |
|                                                                                                | Is the analytic perspective appropriate to your decision problem?                                        | Health system or societal perspective | Societal perspective | Health system perspective | Societal perspective                     | Health system perspective         | Societal perspective                                                |
| ASSESSMENT OF CREDIBILITY                                                                      |                                                                                                          |                                       |                      |                           |                                          |                                   |                                                                     |
| <u>Validation</u>                                                                              |                                                                                                          |                                       |                      |                           |                                          |                                   |                                                                     |
| Is external validation of the model sufficient to make its results credible for your decision? | Has the model been shown to accurately reproduce what was observed in the data used to create the model? |                                       | Not reported         | Not reported              | Used previously published diabetes model | Not reported                      | No external validation possible as German cohort data not available |
|                                                                                                | Has the model been shown to accurately estimate what actually happened in one or more separate studies?  |                                       | Not reported         | Not reported              | Not reported                             | Not reported                      | No external validation possible as German cohort data not available |

|                                                                                                  |                                                                                                                   |  |              |              |                                          |              |              |
|--------------------------------------------------------------------------------------------------|-------------------------------------------------------------------------------------------------------------------|--|--------------|--------------|------------------------------------------|--------------|--------------|
|                                                                                                  | Has the model been shown to accurately forecast what eventually happens in reality?                               |  | Not reported | Not reported | Not reported                             | Not reported | Not reported |
| Is internal verification of the model sufficient to make its results credible for your decision? | Have the process of internal verification and its results been documented in detail?                              |  | Not reported | Not reported | Used previously published diabetes model | Not reported | Not reported |
|                                                                                                  | Has the testing been performed systematically?                                                                    |  | Not reported | Not reported | Not reported                             | Not reported | Not reported |
|                                                                                                  | Does the testing indicate that all the equations are consistent with their data sources?                          |  | Not reported | Not reported | Not reported                             | Not reported | Not reported |
|                                                                                                  | Does the testing indicate that the coding has been correctly implemented?                                         |  | Not reported | Not reported | Not reported                             | Not reported | Not reported |
| Does the model have sufficient face validity to make its results credible for your decision?     | Does the model contain all the aspects considered relevant to the decision?                                       |  | Yes          | Yes          | Yes                                      | Yes          | Yes          |
|                                                                                                  | Are all the relevant aspects represented and linked according to the best understanding of their characteristics? |  | Yes          | Yes          | Yes                                      | Yes          | Yes          |

|                                                                |                                                                                                           |  |                                      |                                                             |                                        |                                      |                                                                                                                                                      |
|----------------------------------------------------------------|-----------------------------------------------------------------------------------------------------------|--|--------------------------------------|-------------------------------------------------------------|----------------------------------------|--------------------------------------|------------------------------------------------------------------------------------------------------------------------------------------------------|
|                                                                | Have the best available data sources been used to inform the various aspects?                             |  | Yes                                  | Features of the lifestyle intervention modelled are unclear | Type of lifestyle intervention unclear | Yes                                  | Patients are identified based on FINDRISK score, but transition probabilities are used from studies where participants identified using FPG and OGTT |
|                                                                | Is the time horizon sufficiently long to account for all relevant aspects of the decision problem?        |  | Yes, 40 years                        | Yes, 50 years                                               | Yes, 10 years                          | Yes, until 100 years or dead         | Yes, lifetime                                                                                                                                        |
|                                                                | Are the results plausible?                                                                                |  | Yes                                  | Yes                                                         | Yes                                    | Yes                                  | Yes                                                                                                                                                  |
|                                                                | If others have rated the face validity, did they have a stake in the results?                             |  | Rating of face validity not reported | Rating of face validity not reported                        | Rating of face validity not reported   | Rating of face validity not reported | Rating of face validity not reported                                                                                                                 |
| <b><u>Design</u></b>                                           |                                                                                                           |  |                                      |                                                             |                                        |                                      |                                                                                                                                                      |
| Is the design of the model adequate for your decision problem? | Was there a clear, written statement of the decision problem, modeling objective, and scope of the model? |  | Yes                                  | Yes                                                         | Yes                                    | Yes                                  | Yes                                                                                                                                                  |

|  |                                                                                                                                            |  |                                                                                 |                                                                                        |                                         |              |              |
|--|--------------------------------------------------------------------------------------------------------------------------------------------|--|---------------------------------------------------------------------------------|----------------------------------------------------------------------------------------|-----------------------------------------|--------------|--------------|
|  | <b>Was there a formal process for developing the model design (e.g. influence diagram, concept map)?</b>                                   |  | Not reported                                                                    | Not reported                                                                           | Not reported                            | Not reported | Not reported |
|  | <b>Is the model concept and structure consistent with, and adequate to address, the decision problem/objective and the policy context?</b> |  | Yes                                                                             | No, transition back to NGT not modelled                                                | No, transition back to NGT not modelled | Yes          | Yes          |
|  | <b>Have any assumptions implied by the design of the model been described, and are they reasonable for your decision problem?</b>          |  | No - assumption regarding duration of impact of this intervention is not stated | No - duration and extent of benefit of lifestyle intervention and metformin is unclear | Yes                                     | Yes          | Yes          |
|  | <b>Is the choice of model type appropriate?</b>                                                                                            |  | Yes                                                                             | Yes                                                                                    | Yes                                     | Yes          | Yes          |
|  | <b>Were key uncertainties in model structure identified and their</b>                                                                      |  | Partially                                                                       | Yes                                                                                    | Yes                                     | Yes          | Yes          |



|                                                                                      |                                                                                 |                                                                |                                                                                 |                                 |                                                                                                                                                                         |                                                                                                                                                                                |                                                                                                                                    |
|--------------------------------------------------------------------------------------|---------------------------------------------------------------------------------|----------------------------------------------------------------|---------------------------------------------------------------------------------|---------------------------------|-------------------------------------------------------------------------------------------------------------------------------------------------------------------------|--------------------------------------------------------------------------------------------------------------------------------------------------------------------------------|------------------------------------------------------------------------------------------------------------------------------------|
|                                                                                      | implications discussed?                                                         |                                                                |                                                                                 |                                 |                                                                                                                                                                         |                                                                                                                                                                                |                                                                                                                                    |
| <b><u>Data</u></b>                                                                   |                                                                                 |                                                                |                                                                                 |                                 |                                                                                                                                                                         |                                                                                                                                                                                |                                                                                                                                    |
| <b>Are the data used in populating the model suitable for your decision problem?</b> | <b>All things considered, do you agree with the values used for the inputs?</b> | <b>Duration and extent of impact of lifestyle intervention</b> | No - assumption regarding duration of impact of this intervention is not stated | Duration of impact not explicit | Extent of impact were from USDPP and FDPS (risk reductions of 60% for IGT and 30% for IFG) and impact modelled unchanged for 10 years as intervention last for 10 years | Effect of lifestyle change will decay by 10% per year, whereas effect of medications will remain constant Lifestyle intervention continues as long as patient has pre-diabetes | Lifestyle program continues for 5 years and benefits of program are modelled for 6 years, declining linearly from year 1 to year 6 |
|                                                                                      |                                                                                 | <b>Source of cost data</b>                                     | Literature                                                                      | Literature review               | Unspecified intervention costing A\$500                                                                                                                                 | Systematic review and meta-analysis                                                                                                                                            | Saxon Diabetes Prevention Programme, CODE-2 study                                                                                  |
|                                                                                      |                                                                                 | <b>Source of outcome data</b>                                  | Literature                                                                      | Literature review               | Literature (FDPS and UKPDS)                                                                                                                                             | Literature                                                                                                                                                                     | Finnish DPS, and literature review                                                                                                 |

|                                                                                              |  |                                 |                                                                                                                                                                                                                                            |                                                                                                                                                                                                         |                                                                                                                                                                                                                                                                                                     |                                                   |                                                                                                                                             |
|----------------------------------------------------------------------------------------------|--|---------------------------------|--------------------------------------------------------------------------------------------------------------------------------------------------------------------------------------------------------------------------------------------|---------------------------------------------------------------------------------------------------------------------------------------------------------------------------------------------------------|-----------------------------------------------------------------------------------------------------------------------------------------------------------------------------------------------------------------------------------------------------------------------------------------------------|---------------------------------------------------|---------------------------------------------------------------------------------------------------------------------------------------------|
|                                                                                              |  | <b>Discount rate</b>            | 3% costs and QALYs                                                                                                                                                                                                                         | 3.5% costs and QALYs                                                                                                                                                                                    | 3% for costs                                                                                                                                                                                                                                                                                        | 3% costs                                          | 3% costs and QALYs                                                                                                                          |
| <b><u>Analysis</u></b>                                                                       |  |                                 |                                                                                                                                                                                                                                            |                                                                                                                                                                                                         |                                                                                                                                                                                                                                                                                                     |                                                   |                                                                                                                                             |
| <b>Were the analyses performed using the model adequate to inform your decision problem?</b> |  |                                 | Yes                                                                                                                                                                                                                                        | Yes                                                                                                                                                                                                     | Yes                                                                                                                                                                                                                                                                                                 | Yes                                               | Yes                                                                                                                                         |
| <b>Was there an adequate assessment of the effects of uncertainty?</b>                       |  | <b>Key sensitivity analyses</b> | Sensitivity analyses:<br>1. Positive rates of screening<br>2. Incidence of IGT and T2DM<br>3. Incidence of mortality and diabetes related complications<br>4. Treatment of diabetes-related disorders<br>5. Utilities of all health states | Sensitivity analyses:<br>1. Prevalence<br>2. Compliance<br>3. Sensitivity of screening tests<br>4. Cost of interventions<br>5. Cost of diabetes<br>6. Effectiveness of interventions<br>7. Time horizon | Sensitivity analyses:<br>1. 70% take up of lifestyle program<br>2. Lower complication rates of T2DM<br>3. Reduce impact of intervention<br>4. Increasing cost of intervention (\$1,000 p.a.)<br>5. Increasing proportion of undiagnosed diabetes<br>6. Increasing proportion of population screened | Sensitivity analysis:<br>1. Second screening OGTT | Probabilistic sensitivity analysis including:<br>1. All transition probabilities<br>2. Cost of NGT, IGT and T2DM<br>3. Cost of intervention |

|                                                                                 |                                                                                             |  |     |     |                                   |     |     |
|---------------------------------------------------------------------------------|---------------------------------------------------------------------------------------------|--|-----|-----|-----------------------------------|-----|-----|
|                                                                                 |                                                                                             |  |     |     | 7. Prevalence<br>8. Discount rate |     |     |
| <b><u>Reporting</u></b>                                                         |                                                                                             |  |     |     |                                   |     |     |
| <b>Was the reporting of the model adequate to inform your decision problem?</b> | <b>Did the report of the analyses provide the results needed for your decision problem?</b> |  | Yes | Yes | Yes                               | Yes | Yes |
|                                                                                 | <b>Was adequate nontechnical documentation freely accessible to any interested reader?</b>  |  | Yes | Yes | No                                | Yes | Yes |

|                                                                                   |                                                                                                                                                                         |  |     |     |            |     |     |
|-----------------------------------------------------------------------------------|-------------------------------------------------------------------------------------------------------------------------------------------------------------------------|--|-----|-----|------------|-----|-----|
|                                                                                   | Was technical documentation, in sufficient detail to allow (potentially) for replication, made available openly or under agreements that protect intellectual property? |  | No  | No  | No         | No  | Yes |
| <b><u>Interpretation</u></b>                                                      |                                                                                                                                                                         |  |     |     |            |     |     |
| Was the interpretation of results fair and balanced?                              |                                                                                                                                                                         |  | Yes | Yes | Yes        | Yes | Yes |
| <b><u>Conflict of interests</u></b>                                               |                                                                                                                                                                         |  |     |     |            |     |     |
| Were there any potential conflicts of interest?                                   |                                                                                                                                                                         |  | No  | No  | Not stated | No  | No  |
| If there were potential conflicts of interest, were steps taken to address these? |                                                                                                                                                                         |  | NA  | NA  | NA         | NA  | NA  |

APPENDIX 4 CONTINUED:

| QUESTIONS                      | HELPER QUESTIONS              | SPECIFIC ELEMENTS EXAMINED | Smith, 2010                                           | Feldman, 2013                                                                                                                                                                                         | Jacobs Van Der Bruggen, 2007                                                               | Irvine, 2011                                                                                                                                                                                            | Sagarra, 2013           |
|--------------------------------|-------------------------------|----------------------------|-------------------------------------------------------|-------------------------------------------------------------------------------------------------------------------------------------------------------------------------------------------------------|--------------------------------------------------------------------------------------------|---------------------------------------------------------------------------------------------------------------------------------------------------------------------------------------------------------|-------------------------|
| ASSESSMENT OF RELEVANCE        |                               |                            |                                                       |                                                                                                                                                                                                       |                                                                                            |                                                                                                                                                                                                         |                         |
| 1. Is the population relevant? | Are the demographics similar? | Age, ethnicity, gender     | US population, 55 yrs age 27.1% African American      | Not reported                                                                                                                                                                                          | Age: 30-70 years                                                                           | Age: 40-70 years<br>BMI $\geq$ 25kg/m <sup>2</sup><br>First degree relative with T2DM or waist circumference >94cm men and >80 cm women, history of coronary heart disease, IFG or gestational diabetes | Age: 45-75 years        |
|                                | Are risk factors similar?     | Type of pre-diabetes, BMI  | BMI $\geq$ 25kg/m <sup>2</sup> and metabolic syndrome | Participants with metabolic syndrome recruited (central obesity, high triglyceride and HDL, high blood pressure, impaired fasting glucose or previously diagnosed T2DM). 34% of participants had T2DM | Intensive intervention for obese adults<br>Community intervention for the whole population | IFG and T2DM                                                                                                                                                                                            | IGT, IFG or IGT and IFG |

|                                           |                                                                                           |                              |                                                                                         |                                                                                             |                                                                                                               |                                                                        |                                                                                                                                                  |
|-------------------------------------------|-------------------------------------------------------------------------------------------|------------------------------|-----------------------------------------------------------------------------------------|---------------------------------------------------------------------------------------------|---------------------------------------------------------------------------------------------------------------|------------------------------------------------------------------------|--------------------------------------------------------------------------------------------------------------------------------------------------|
|                                           | Are behaviors similar?                                                                    | Compliance with intervention | 47% who screened positive enrolled in intervention                                      | Non compliance not modelled, participation rates based on Kalmar Metabolic Syndrome Program | 50% compliance with intensive lifestyle intervention                                                          | Compliance with intervention included (57-97% in different activities) | Failure to attend screening (20%), failure to attend confirmatory blood test (42% of total population), failure to enrol in intervention (11.5%) |
|                                           | Is the medical condition similar?                                                         |                              | Yes                                                                                     | Yes                                                                                         | Yes                                                                                                           | Yes                                                                    | Yes                                                                                                                                              |
| 2 Are any critical interventions missing? | Does the intervention analyzed in the model match the intervention you are interested in? | Type of intervention         | 1. Lifestyle program (modified US DPP, less sessions and group format)<br>2. Usual care | 1. Lifestyle program (Kalmar Metabolic Syndrome Program)<br>2. Usual care                   | 1. Intensive lifestyle program (3 years)<br>2. Community-wide nutrition and exercise program<br>3. Usual care | 1. Lifestyle program (UEA-IFG)<br>2. Usual care                        | 1. Individual lifestyle program (DE-PLAN-CAT)<br>2. Group lifestyle program (DE-PLAN-CAT)<br>3. Usual care                                       |
|                                           | Have all relevant comparators been considered?                                            |                              | No, metformin not modelled                                                              | No, metformin not modelled                                                                  | No, metformin not modelled                                                                                    | No, metformin not included                                             | Metformin not included                                                                                                                           |
|                                           | Does the background care in the model match yours?                                        |                              | US health system                                                                        | Swedish health system                                                                       | The Netherlands health system                                                                                 | UK health system                                                       | Spanish health system                                                                                                                            |

|                                                                                                |                                                                                                          |                                       |                                          |                                        |                           |                                                 |                              |
|------------------------------------------------------------------------------------------------|----------------------------------------------------------------------------------------------------------|---------------------------------------|------------------------------------------|----------------------------------------|---------------------------|-------------------------------------------------|------------------------------|
| 3 Are any relevant outcomes missing?                                                           | Are the health outcomes relevant to you considered?                                                      |                                       | Yes, QALY                                | Yes, QALYs                             | Yes, QALYs                | No, impact on diabetes incidence not considered | Yes, QALYs                   |
|                                                                                                | Are the economic end points relevant to you considered?                                                  |                                       | Yes, \$/QALY                             | Yes, Euro/QALY                         | Yes, Euro/QALY            | Yes, £/QALY                                     | Yes, Euro/QALY               |
| 4. Is the context (settings and circumstances) applicable?                                     | Is the geographic location similar?                                                                      |                                       | US                                       | Sweden                                 | The Netherlands           | The UK                                          | Spain                        |
|                                                                                                | Is the time horizon applicable to your decision?                                                         |                                       | No, 3 year analysis                      | Yes, until 85 years of age             | Yes, 70 years             | No, less than 1 year                            | No, 4 year analysis          |
|                                                                                                | Is the analytic perspective appropriate to your decision problem?                                        | Health system or societal perspective | Health system perspective                | Health system and Societal perspective | Health system perspective | Health system perspective                       | Health system perspective    |
| ASSESSMENT OF CREDIBILITY                                                                      |                                                                                                          |                                       |                                          |                                        |                           |                                                 |                              |
| <u>Validation</u>                                                                              |                                                                                                          |                                       |                                          |                                        |                           |                                                 |                              |
| Is external validation of the model sufficient to make its results credible for your decision? | Has the model been shown to accurately reproduce what was observed in the data used to create the model? |                                       | Used previously published diabetes model | Not reported                           | Not reported              | <i>Not a modelling study</i>                    | <i>Not a modelling study</i> |
|                                                                                                | Has the model been shown to accurately estimate what actually happened                                   |                                       | Not reported                             | Not reported                           | Not reported              |                                                 |                              |

|                                                                                                  |                                                                                          |  |                                          |              |                                                                                                                                   |                              |                              |
|--------------------------------------------------------------------------------------------------|------------------------------------------------------------------------------------------|--|------------------------------------------|--------------|-----------------------------------------------------------------------------------------------------------------------------------|------------------------------|------------------------------|
|                                                                                                  | in one or more separate studies?                                                         |  |                                          |              |                                                                                                                                   |                              |                              |
|                                                                                                  | Has the model been shown to accurately forecast what eventually happens in reality?      |  | Not reported                             | Not reported | Not reported                                                                                                                      |                              |                              |
| Is internal verification of the model sufficient to make its results credible for your decision? | Have the process of internal verification and its results been documented in detail?     |  | Used previously published diabetes model | Not reported | Based on previously published model (National Institute for Public Health and the Environment (RIVM) chronic disease model (CDM)) | <i>Not a modelling study</i> | <i>Not a modelling study</i> |
|                                                                                                  | Has the testing been performed systematically?                                           |  | Not reported                             | Not reported | Not reported                                                                                                                      |                              |                              |
|                                                                                                  | Does the testing indicate that all the equations are consistent with their data sources? |  | Not reported                             | Not reported | Not reported                                                                                                                      |                              |                              |
|                                                                                                  | Does the testing indicate that the coding has been correctly implemented?                |  | Not reported                             | Not reported | Not reported                                                                                                                      |                              |                              |
| Does the model have sufficient face validity to make its results credible for your decision?     | Does the model contain all the aspects considered relevant to the decision?              |  | Yes                                      | Yes          | Yes                                                                                                                               | <i>Not a modelling study</i> | <i>Not a modelling study</i> |



|               |                                                                                                                   |  |                                      |                                      |                                      |  |  |
|---------------|-------------------------------------------------------------------------------------------------------------------|--|--------------------------------------|--------------------------------------|--------------------------------------|--|--|
|               | Are all the relevant aspects represented and linked according to the best understanding of their characteristics? |  | Yes                                  | Yes                                  | Yes                                  |  |  |
|               | Have the best available data sources been used to inform the various aspects?                                     |  | Yes                                  | Yes                                  | Yes                                  |  |  |
|               | Is the time horizon sufficiently long to account for all relevant aspects of the decision problem?                |  | No, 3 year analysis                  | Yes                                  | Yes                                  |  |  |
|               | Are the results plausible?                                                                                        |  | Yes                                  | Yes                                  | Yes                                  |  |  |
|               | If others have rated the face validity, did they have a stake in the results?                                     |  | Rating of face validity not reported | Rating of face validity not reported | Rating of face validity not reported |  |  |
| <u>Design</u> |                                                                                                                   |  |                                      |                                      |                                      |  |  |

|                                                                |                                                                                                                                     |  |              |              |              |                       |                       |
|----------------------------------------------------------------|-------------------------------------------------------------------------------------------------------------------------------------|--|--------------|--------------|--------------|-----------------------|-----------------------|
| Is the design of the model adequate for your decision problem? | Was there a clear, written statement of the decision problem, modeling objective, and scope of the model?                           |  | Yes          | Yes          | Yes          | Not a modelling study | Not a modelling study |
|                                                                | Was there a formal process for developing the model design (e.g. influence diagram, concept map)?                                   |  | Not reported | Not reported | Not reported |                       |                       |
|                                                                | Is the model concept and structure consistent with, and adequate to address, the decision problem/objective and the policy context? |  | Yes          | Yes          | Yes          |                       |                       |
|                                                                | Have any assumptions implied by the design of the model been described, and are they reasonable for your decision problem?          |  | Yes          | Yes          | Yes          |                       |                       |

|                                                                               |                                                                                        |                                                         |                                                                                                                              |                                                                                                                                                                                                                         |                                                                                                                                                                                                                                                      |                       |                                              |
|-------------------------------------------------------------------------------|----------------------------------------------------------------------------------------|---------------------------------------------------------|------------------------------------------------------------------------------------------------------------------------------|-------------------------------------------------------------------------------------------------------------------------------------------------------------------------------------------------------------------------|------------------------------------------------------------------------------------------------------------------------------------------------------------------------------------------------------------------------------------------------------|-----------------------|----------------------------------------------|
|                                                                               | Is the choice of model type appropriate?                                               |                                                         | Yes                                                                                                                          | Yes                                                                                                                                                                                                                     | Yes                                                                                                                                                                                                                                                  |                       |                                              |
|                                                                               | Were key uncertainties in model structure identified and their implications discussed? |                                                         | Yes                                                                                                                          | Yes                                                                                                                                                                                                                     | Yes                                                                                                                                                                                                                                                  |                       |                                              |
| <u>Data</u>                                                                   |                                                                                        |                                                         |                                                                                                                              |                                                                                                                                                                                                                         |                                                                                                                                                                                                                                                      |                       |                                              |
| Are the data used in populating the model suitable for your decision problem? | All things considered, do you agree with the values used for the inputs?               | Duration and extent of impact of lifestyle intervention | Extent of impact: based on community based USDPP in Pennsylvania for year 1, then placebo arm of the USDPP for years 2 and 3 | Improvements in risk profile seen following lifestyle program remain constant for 12 months after intervention (2 years in total), then decline annually, with no additional benefit modelled from the 5th year onwards | Community intervention: BMI decrease by 0.05kg/m <sup>2</sup> and 15% inactive individuals increase activity<br>Intensive intervention: BMI decrease by 0.3kg/m <sup>2</sup> -1.5kg/m <sup>2</sup> and 50-75% inactive individuals increase activity | Within-trial analysis | Yes, in-trial analysis                       |
|                                                                               |                                                                                        | Source of cost data                                     | Community-based, modified USDPP, UKPDS, Framingham Heart Study                                                               | Kalmar Metabolic Syndrome Program                                                                                                                                                                                       | Two Dutch trials (Heart Health Limburg, Lifstyle Intervention and Impaired Glucose Tolerance Maastricht)                                                                                                                                             | UK trial (UEA-IFG)    | Collection of cost data in DE-PLAN-CAT trial |

|                                                                                       |  |                        |                                                |                                               |                           |                                               |                                                   |
|---------------------------------------------------------------------------------------|--|------------------------|------------------------------------------------|-----------------------------------------------|---------------------------|-----------------------------------------------|---------------------------------------------------|
|                                                                                       |  | Source of outcome data | Community-based modified USDPP in Pennsylvania | Kalmar Metabolic Syndrome Program, literature | Literature                | UK trial (UEA-IFG)                            | 15D questionnaire in DE-PLAN-CAT trial            |
|                                                                                       |  | Discount rate          | 3% for costs and QALYs                         | 3% costs and QALYs                            | 4% costs and 1.5% effects | No discounting, analysis <1 year              | No discounting due to short analytical time frame |
| <u>Analysis</u>                                                                       |  |                        |                                                |                                               |                           |                                               |                                                   |
| Were the analyses performed using the model adequate to inform your decision problem? |  |                        | Yes                                            | Yes                                           | Yes                       | Yes, but short timeframe limits applicability | Yes                                               |

|                                                                          |                                                                                      |                          |                                                                                                                                                 |                                                                                                                                                                 |                                                                     |                                                                                                                                                                                                                                           |                                                                       |
|--------------------------------------------------------------------------|--------------------------------------------------------------------------------------|--------------------------|-------------------------------------------------------------------------------------------------------------------------------------------------|-----------------------------------------------------------------------------------------------------------------------------------------------------------------|---------------------------------------------------------------------|-------------------------------------------------------------------------------------------------------------------------------------------------------------------------------------------------------------------------------------------|-----------------------------------------------------------------------|
| Was there an adequate assessment of the effects of uncertainty?          |                                                                                      | Key sensitivity analyses | Probabilistic sensitivity analyses including:<br>1. Transition probabilities<br>2. Enrllment<br>3. Screening true positive rate<br>4. Utilities | Sensitivity analyses include:<br>1. Discount rate<br>2. Duration of relatiev risk reduction following lifetsyle program<br>3. Grouping by gender or risk factor | Sensitivity analyses:<br>1. Intervention costs<br>2. Discount rates | Sensitivity analyses:<br>1. Including costs of screening<br>2. IFG participants only<br>3. T2DM participants only<br>4. Only include participants with >4 months follow-up<br>5. Complete case results only<br>6. Excluding trainer costs | Sensitivity analyses:<br>1. Costs<br>2. Effectiveness of intervention |
| <u>Reporting</u>                                                         |                                                                                      |                          |                                                                                                                                                 |                                                                                                                                                                 |                                                                     |                                                                                                                                                                                                                                           |                                                                       |
| Was the reporting of the model adequate to inform your decision problem? | Did the report of the analyses provide the results needed for your decision problem? |                          | Yes                                                                                                                                             | Yes                                                                                                                                                             | Yes                                                                 | Yes                                                                                                                                                                                                                                       | Yes                                                                   |
|                                                                          | Was adequate nontechnical documentation freely accessible to any interested reader?  |                          | Yes                                                                                                                                             | Yes                                                                                                                                                             | Yes                                                                 | Yes                                                                                                                                                                                                                                       | Yes, not a modelling study                                            |

|                                                                                   |                                                                                                                                                                         |  |            |                                                                        |            |     |     |
|-----------------------------------------------------------------------------------|-------------------------------------------------------------------------------------------------------------------------------------------------------------------------|--|------------|------------------------------------------------------------------------|------------|-----|-----|
|                                                                                   | Was technical documentation, in sufficient detail to allow (potentially) for replication, made available openly or under agreements that protect intellectual property? |  | Yes        | Unclear, supplementary material created but no longer available online | No         | Yes | NA  |
| <u>Interpretation</u>                                                             |                                                                                                                                                                         |  |            |                                                                        |            |     |     |
| Was the interpretation of results fair and balanced?                              |                                                                                                                                                                         |  | Yes        | Yes                                                                    | Yes        | Yes | Yes |
| <u>Conflict of interests</u>                                                      |                                                                                                                                                                         |  |            |                                                                        |            |     |     |
| Were there any potential conflicts of interest?                                   |                                                                                                                                                                         |  | Not stated | No                                                                     | Not stated | No  | No  |
| If there were potential conflicts of interest, were steps taken to address these? |                                                                                                                                                                         |  | NA         | NA                                                                     | NA         | NA  | NA  |

**APPENDIX 4 CONTINUED:**

| QUESTIONS                      | HELPER QUESTIONS              | SPECIFIC ELEMENTS EXAMINED   | Zhou, 2012                                            | Dall, 2015                            |
|--------------------------------|-------------------------------|------------------------------|-------------------------------------------------------|---------------------------------------|
| ASSESSMENT OF RELEVANCE        |                               |                              |                                                       |                                       |
| 1. Is the population relevant? | Are the demographics similar? | Age, ethnicity, gender       | Age: 18-64 years, 65-84 yrs<br>US national population | Adults in US population (from NHANES) |
|                                | Are risk factors similar?     | Type of pre-diabetes, BMI    | Obesity and FPG or HbA1c                              | Elevated HbA1c                        |
|                                | Are behaviors similar?        | Compliance with intervention | 50-60% uptake of lifestyle intervention modelled      | Non-compliance not modelled           |

|                                                            |                                                                                           |                                       |                                                                              |                                                        |
|------------------------------------------------------------|-------------------------------------------------------------------------------------------|---------------------------------------|------------------------------------------------------------------------------|--------------------------------------------------------|
|                                                            | Is the medical condition similar?                                                         |                                       | Yes                                                                          | Yes                                                    |
| 2 Are any critical interventions missing?                  | Does the intervention analyzed in the model match the intervention you are interested in? | Type of intervention                  | 1. Lifestyle program (community-based translation of USDPP)<br>2. Usual care | 1. Lifestyle program (based on DPPOS)<br>2. Usual care |
|                                                            | Have all relevant comparators been considered?                                            |                                       | No, metformin not included                                                   | No, metformin excluded                                 |
|                                                            | Does the background care in the model match yours?                                        |                                       | US health system                                                             | US health system                                       |
| 3 Are any relevant outcomes missing?                       | Are the health outcomes relevant to you considered?                                       |                                       | Yes, QALYs                                                                   | No, only report net savings                            |
|                                                            | Are the economic end points relevant to you considered?                                   |                                       | Yes, \$/QALY                                                                 | No                                                     |
| 4. Is the context (settings and circumstances) applicable? | Is the geographic location similar?                                                       |                                       | US                                                                           | US                                                     |
|                                                            | Is the time horizon applicable to your decision?                                          |                                       | Yes, 25 years                                                                | Yes, 10 years                                          |
|                                                            | Is the analytic perspective appropriate to your decision problem?                         | Health system or societal perspective | Health system perspective                                                    | Societal perspective                                   |
| ASSESSMENT OF CREDIBILITY                                  |                                                                                           |                                       |                                                                              |                                                        |
| <u>Validation</u>                                          |                                                                                           |                                       |                                                                              |                                                        |



|                                                                                                  |                                                                                                          |  |                                                      |              |
|--------------------------------------------------------------------------------------------------|----------------------------------------------------------------------------------------------------------|--|------------------------------------------------------|--------------|
| Is external validation of the model sufficient to make its results credible for your decision?   | Has the model been shown to accurately reproduce what was observed in the data used to create the model? |  | Yes, used a previously published and validated model | Not reported |
|                                                                                                  | Has the model been shown to accurately estimate what actually happened in one or more separate studies?  |  | Yes, used a previously published and validated model | Not reported |
|                                                                                                  | Has the model been shown to accurately forecast what eventually happens in reality?                      |  | Yes, used a previously published and validated model | Not reported |
| Is internal verification of the model sufficient to make its results credible for your decision? | Have the process of internal verification and its results been documented in detail?                     |  | Not reported                                         | Yes          |
|                                                                                                  | Has the testing been performed systematically?                                                           |  | Not reported                                         | Yes          |
|                                                                                                  | Does the testing indicate that all the equations are consistent with their data sources?                 |  | Not reported                                         | Yes          |
|                                                                                                  | Does the testing indicate that the coding has been correctly implemented?                                |  | Not reported                                         | Yes          |
| Does the model have sufficient face validity to make its results credible for your decision?     | Does the model contain all the aspects considered relevant to the decision?                              |  | Yes                                                  | Yes          |

|                                                                |                                                                                                                   |  |                                      |                                                                       |
|----------------------------------------------------------------|-------------------------------------------------------------------------------------------------------------------|--|--------------------------------------|-----------------------------------------------------------------------|
|                                                                | Are all the relevant aspects represented and linked according to the best understanding of their characteristics? |  | Yes                                  | Yes                                                                   |
|                                                                | Have the best available data sources been used to inform the various aspects?                                     |  | Yes                                  | No, assumes 50% reduction in incidence of T2DM d/t lifestyle programs |
|                                                                | Is the time horizon sufficiently long to account for all relevant aspects of the decision problem?                |  | Yes, 25 years                        | Yes                                                                   |
|                                                                | Are the results plausible?                                                                                        |  | Yes                                  | No, due to assumptions regarding compliance and risk education        |
|                                                                | If others have rated the face validity, did they have a stake in the results?                                     |  | Rating of face validity not reported | Rating of face validity not reported                                  |
| <u>Design</u>                                                  |                                                                                                                   |  |                                      |                                                                       |
| Is the design of the model adequate for your decision problem? | Was there a clear, written statement of the decision problem, modeling objective, and scope of the model?         |  | Yes                                  | Yes                                                                   |

|             |                                                                                                                                     |  |     |                                                                                                        |
|-------------|-------------------------------------------------------------------------------------------------------------------------------------|--|-----|--------------------------------------------------------------------------------------------------------|
|             | Was there a formal process for developing the model design (e.g. influence diagram, concept map)?                                   |  | Yes | Yes                                                                                                    |
|             | Is the model concept and structure consistent with, and adequate to address, the decision problem/objective and the policy context? |  | Yes | Yes                                                                                                    |
|             | Have any assumptions implied by the design of the model been described, and are they reasonable for your decision problem?          |  | Yes | Assumptions regarding 100% compliance and 50% cumulative reduction in diabetes incidence are ambitious |
|             | Is the choice of model type appropriate?                                                                                            |  | Yes | Yes                                                                                                    |
|             | Were key uncertainties in model structure identified and their implications discussed?                                              |  | Yes | Yes                                                                                                    |
| <u>Data</u> |                                                                                                                                     |  |     |                                                                                                        |

|                                                                               |                                                                          |                                                         |                                                                                                                      |                                                                           |
|-------------------------------------------------------------------------------|--------------------------------------------------------------------------|---------------------------------------------------------|----------------------------------------------------------------------------------------------------------------------|---------------------------------------------------------------------------|
| Are the data used in populating the model suitable for your decision problem? | All things considered, do you agree with the values used for the inputs? | Duration and extent of impact of lifestyle intervention | 50-60% reduction in diabetes risk in first 2 years of program, 10-15% in third year, no impact thereafter            | 41% cumulative reduction in diabetes incidence over 10 years is ambitious |
|                                                                               |                                                                          | Source of cost data                                     | Modified USDPP (Promoting a Lifestyle of Activity and Nutrition for Working to Alter the Risk of Diabetes) and DPPOS | Literature and MEPS/NHIS                                                  |
|                                                                               |                                                                          | Source of outcome data                                  | Claims data                                                                                                          | Literature (CDC, UKPDS, Framingham)                                       |
|                                                                               |                                                                          | Discount rate                                           | 3% for costs and effects                                                                                             | 3% for costs and QALYs                                                    |
| <u>Analysis</u>                                                               |                                                                          |                                                         |                                                                                                                      |                                                                           |

|                                                                                       |                                                                                      |                          |                                                                                                                                                                                          |                                                                                                                                                                       |
|---------------------------------------------------------------------------------------|--------------------------------------------------------------------------------------|--------------------------|------------------------------------------------------------------------------------------------------------------------------------------------------------------------------------------|-----------------------------------------------------------------------------------------------------------------------------------------------------------------------|
| Were the analyses performed using the model adequate to inform your decision problem? |                                                                                      |                          | Yes                                                                                                                                                                                      | Yes                                                                                                                                                                   |
| Was there an adequate assessment of the effects of uncertainty?                       |                                                                                      | Key sensitivity analyses | Sensitivity analyses:<br>1. Effectiveness of lifestyle intervention<br>2. Cost of intervention<br>3. Age of participants<br>4. Rates of participation in screening test and intervention | Sensitivity analyses:<br>1. Intervention effect<br>2. HbA1c<br>3. BMI<br>4. Blood pressure<br>5. Lipid profile<br>3. Annual probability of T2Dm and its complications |
| <u>Reporting</u>                                                                      |                                                                                      |                          |                                                                                                                                                                                          |                                                                                                                                                                       |
| Was the reporting of the model adequate to inform your decision problem?              | Did the report of the analyses provide the results needed for your decision problem? |                          | Yes                                                                                                                                                                                      | Yes                                                                                                                                                                   |
|                                                                                       | Was adequate nontechnical documentation freely accessible to any interested reader?  |                          | Yes                                                                                                                                                                                      | Yes                                                                                                                                                                   |

|                                                                                   |                                                                                                                                                                         |  |            |         |
|-----------------------------------------------------------------------------------|-------------------------------------------------------------------------------------------------------------------------------------------------------------------------|--|------------|---------|
|                                                                                   | Was technical documentation, in sufficient detail to allow (potentially) for replication, made available openly or under agreements that protect intellectual property? |  | No         | Yes     |
| <u>Interpretation</u>                                                             |                                                                                                                                                                         |  |            |         |
| Was the interpretation of results fair and balanced?                              |                                                                                                                                                                         |  | Yes        | Yes     |
| <u>Conflict of interests</u>                                                      |                                                                                                                                                                         |  |            |         |
| Were there any potential conflicts of interest?                                   |                                                                                                                                                                         |  | Not stated | Yes     |
| If there were potential conflicts of interest, were steps taken to address these? |                                                                                                                                                                         |  | NA         | Unclear |
